# Supplementary material for: Tailoring the selectivity of phenanthroline derivatives for the partitioning of trivalent Am/Eu ions – a relativistic DFT study
Source: Royal Society of Chemistry journal article supplement (doi:10.1039/d1qi00097g), 2021-01-01
Supplement: d1qi00097g1.pdf [file d1qi00097g1.pdf]

## **SUPPLEMENTARY INFORMATION**

### **Tailoring the selectivity of phenanthroline derivatives for the partitioning of trivalent Am/Eu ions - A relativistic DFT study**

Cheriyān Ebenezer<sup>a</sup> and R.Vijay Solomon\*<sup>a</sup>

<sup>a</sup>Department of Chemistry, Madras Christian College (Autonomous),  
(Affiliated to the University of Madras), Chennai – 600 059, India

Contents :

Page 3: Selected Bond Parameters of the metal complexes and the crystal structures.

Page 4: M-O Bond Parameters of the  $M(NO_3)_3$  molecule and the complexes

Page 5: HOMO-LUMO gap of ligands and SOMO-LUMO gap of metal complexes. (in eV)

Pages 6: Net charges obtained from Mulliken Population Analysis carried out at ZORA/  
BP86 level using ADF software

Page 7: Net charges obtained from Natural Population Analysis carried out at ZORA/  
BP86 level using ADF software

Page 8: M and O Mulliken Charges of the  $M(NO_3)_3$  molecule and the complexes

Page 9: QTAIM analysis of electron density  $\rho(e/\text{bohr}^3)$  at Metal – Oxygen Bond Critical  
Points of the  $M(NO_3)_3$  molecule and the complexes

Pages 10-52: Optimized Coordinates of the ligands and complexes

Supplementary Information Table 1: Selected Bond Parameters of the metal complexes and the crystal structures.

|   | Bond Parameter                                                 | Am-1   | Eu-1   | Am-2   | Eu-2   | Am-3   | Eu-3   | 905130  |
|---|----------------------------------------------------------------|--------|--------|--------|--------|--------|--------|---------|
| A | Bond Length                                                    |        |        |        |        |        |        |         |
| 1 | C <sub>1</sub> -C <sub>2</sub>                                 | 1.446  | 1.453  | 1.446  | 1.453  | 1.444  | 1.451  | 1.444   |
| 2 | C <sub>1</sub> -N <sub>1</sub>                                 | 1.359  | 1.356  | 1.360  | 1.357  | 1.360  | 1.357  | 1.351   |
| 3 | C <sub>2</sub> -N <sub>2</sub>                                 | 1.359  | 1.355  | 1.359  | 1.355  | 1.360  | 1.357  | 1.353   |
| 4 | N <sub>2</sub> -C <sub>8</sub>                                 | 1.346  | 1.341  | 1.345  | 1.341  | 1.346  | 1.340  | 1.329   |
| 5 | N <sub>1</sub> -C <sub>7</sub>                                 | 1.346  | 1.340  | 1.347  | 1.340  | 1.345  | 1.340  | 1.336   |
| B | Bond Angle                                                     |        |        |        |        |        |        |         |
| 1 | C <sub>1</sub> -N <sub>1</sub> -C <sub>7</sub>                 | 118.43 | 118.73 | 118.66 | 118.95 | 118.57 | 118.89 | 118.14  |
| 2 | C <sub>2</sub> -N <sub>2</sub> -C <sub>8</sub>                 | 118.41 | 118.78 | 118.40 | 118.73 | 118.60 | 118.92 | 118.56  |
| C | Dihedral Angle                                                 |        |        |        |        |        |        |         |
| 1 | C <sub>5</sub> -C <sub>1</sub> -N <sub>1</sub> -C <sub>7</sub> | 0.60   | 0.10   | 2.42   | 1.43   | 1.84   | 1.30   | 1.21    |
| 2 | C <sub>3</sub> -C <sub>2</sub> -N <sub>2</sub> -C <sub>8</sub> | 1.88   | 1.20   | 1.24   | 0.68   | 2.08   | 1.51   | -0.06   |
|   | Bond Parameter                                                 | Am-4   | Eu-4   | Am-5   | Eu-5   | Am-6   | Eu-6   | 1891927 |
| A | Bond Length                                                    |        |        |        |        |        |        |         |
| 1 | C <sub>1</sub> -C <sub>2</sub>                                 | 1.446  | 1.453  | 1.446  | 1.453  | 1.444  | 1.451  | 1.431   |
| 2 | C <sub>1</sub> -N <sub>1</sub>                                 | 1.359  | 1.355  | 1.358  | 1.355  | 1.359  | 1.357  | 1.355   |
| 3 | C <sub>2</sub> -N <sub>2</sub>                                 | 1.358  | 1.356  | 1.360  | 1.357  | 1.360  | 1.356  | 1.352   |
| 4 | N <sub>2</sub> -C <sub>8</sub>                                 | 1.347  | 1.341  | 1.346  | 1.340  | 1.345  | 1.341  | 1.334   |
| 5 | N <sub>1</sub> -C <sub>7</sub>                                 | 1.347  | 1.341  | 1.347  | 1.341  | 1.346  | 1.341  | 1.332   |
| B | Bond Angle                                                     |        |        |        |        |        |        |         |
| 1 | C <sub>1</sub> -N <sub>1</sub> -C <sub>7</sub>                 | 118.45 | 118.80 | 118.44 | 118.75 | 118.63 | 118.92 | 118.33  |
| 2 | C <sub>2</sub> -N <sub>2</sub> -C <sub>8</sub>                 | 118.44 | 118.77 | 118.64 | 118.98 | 118.65 | 118.92 | 119.02  |
| C | Dihedral Angle                                                 |        |        |        |        |        |        |         |
| 1 | C <sub>5</sub> -C <sub>1</sub> -N <sub>1</sub> -C <sub>7</sub> | 1.43   | 1.11   | 2.15   | 1.08   | 2.18   | 1.56   | 1.09    |
| 2 | C <sub>3</sub> -C <sub>2</sub> -N <sub>2</sub> -C <sub>8</sub> | 1.07   | 0.46   | 1.49   | 1.47   | 1.78   | 1.15   | -0.98   |

Supplementary Information Table 2: M-O Bond Parameters of the  $M(\text{NO}_3)_3$  molecule and the complexes

|                                   | M-O <sub>1</sub> | M-O <sub>3</sub> | M-O <sub>7</sub> | M-O <sub>9</sub> | M-O <sub>10</sub> | M-O <sub>12</sub> |
|-----------------------------------|------------------|------------------|------------------|------------------|-------------------|-------------------|
| Am(NO <sub>3</sub> ) <sub>3</sub> | 2.471            | 2.473            | 2.472            | 2.472            | 2.476             | 2.475             |
| Eu(NO <sub>3</sub> ) <sub>3</sub> | 2.479            | 2.481            | 2.480            | 2.479            | 2.486             | 2.484             |
| Am-1                              | 2.569            | 2.594            | 2.724            | 2.635            | 2.544             | 2.552             |
| Eu-1                              | 2.558            | 2.560            | 2.643            | 2.687            | 2.558             | 2.560             |
| Am-2                              | 2.601            | 2.564            | 2.562            | 2.554            | 2.632             | 2.727             |
| Eu-2                              | 2.669            | 2.663            | 2.563            | 2.569            | 2.673             | 2.661             |
| Am-3                              | 2.556            | 2.571            | 2.716            | 2.638            | 2.572             | 2.599             |
| Eu-3                              | 2.681            | 2.655            | 2.651            | 2.681            | 2.571             | 2.566             |
| Am-4                              | 2.729            | 2.638            | 2.585            | 2.561            | 2.550             | 2.562             |
| Eu-4                              | 2.696            | 2.641            | 2.555            | 2.566            | 2.632             | 2.698             |
| Am-5                              | 2.692            | 2.626            | 2.602            | 2.571            | 2.572             | 2.563             |
| Eu-5                              | 2.563            | 2.566            | 2.699            | 2.638            | 2.634             | 2.699             |
| Am-6                              | 2.707            | 2.635            | 2.563            | 2.572            | 2.599             | 2.567             |
| Eu-6                              | 2.700            | 2.638            | 2.564            | 2.567            | 2.634             | 2.699             |

Supplementary Information Table 3: HOMO-LUMO gap of ligands and SOMO-LUMO gap of metal complexes. (in eV)

|      | SOMO   | LUMO   | GAP   |
|------|--------|--------|-------|
| Am-1 | -3.997 | -3.921 | 0.076 |
| Eu-1 | -4.149 | -3.986 | 0.163 |
| Am-2 | -3.932 | -3.861 | 0.070 |
| Eu-2 | -4.068 | -3.913 | 0.155 |
| Am-3 | -3.885 | -3.806 | 0.078 |
| Eu-3 | -4.019 | -3.850 | 0.168 |
| Am-4 | -4.005 | -3.923 | 0.081 |
| Eu-4 | -4.136 | -3.989 | 0.146 |
| Am-5 | -3.923 | -3.855 | 0.068 |
| Eu-5 | -4.070 | -3.907 | 0.163 |
| Am-6 | -3.874 | -3.801 | 0.073 |
| Eu-6 | -3.989 | -3.847 | 0.141 |
|      | HOMO   | LUMO   | GAP   |
| 1    | -5.017 | -3.061 | 1.956 |
| 2    | -4.925 | -3.069 | 1.855 |
| 3    | -4.887 | -3.045 | 1.842 |
| 4    | -5.096 | -3.045 | 2.051 |
| 5    | -5.061 | -3.017 | 2.043 |
| 6    | -5.042 | -2.976 | 2.065 |

Supplementary Information Table 4: Net charges obtained from Mulliken Population

Analysis carried out at ZORA/ BP86 level using ADF software

| Complexes | N <sub>1</sub> | N <sub>2</sub> | N <sub>3</sub> | N <sub>4</sub> | M     |
|-----------|----------------|----------------|----------------|----------------|-------|
| Am-1      | -0.429         | -0.293         | -0.296         | -0.430         | 1.571 |
| Eu-1      | -0.418         | -0.296         | -0.296         | -0.417         | 1.573 |
| Am-2      | -0.429         | -0.293         | -0.297         | -0.432         | 1.553 |
| Eu-2      | -0.417         | -0.297         | -0.296         | -0.420         | 1.560 |
| Am-3      | -0.430         | -0.296         | -0.298         | -0.431         | 1.547 |
| Eu-3      | -0.421         | -0.298         | -0.297         | -0.420         | 1.555 |
| Am-4      | -0.430         | -0.295         | -0.294         | -0.428         | 1.591 |
| Eu-4      | -0.414         | -0.293         | -0.293         | -0.417         | 1.576 |
| Am-5      | -0.430         | -0.296         | -0.294         | -0.428         | 1.575 |
| Eu-5      | -0.418         | -0.292         | -0.294         | -0.416         | 1.565 |
| Am-6      | -0.429         | -0.296         | -0.296         | -0.430         | 1.569 |
| Eu-6      | -0.418         | -0.295         | -0.294         | -0.417         | 1.558 |

Supplementary Information Table 5: Net charges obtained from Natural Population Analysis carried out at ZORA/ BP86 level using ADF software

| Complexes | N <sub>1</sub> | N <sub>2</sub> | N <sub>3</sub> | N <sub>4</sub> | M      |
|-----------|----------------|----------------|----------------|----------------|--------|
| Am-1      | -0.4198        | -0.2297        | -0.2266        | -0.4214        | 1.0156 |
| Eu-1      | -0.4001        | -0.2229        | -0.2225        | -0.4009        | 1.0424 |
| Am-2      | -0.4203        | -0.2301        | -0.2285        | -0.4224        | 1.0162 |
| Eu-2      | -0.4006        | -0.2237        | -0.2232        | -0.4014        | 1.0427 |
| Am-3      | -0.4222        | -0.2296        | -0.2299        | -0.4217        | 1.0164 |
| Eu-3      | -0.4025        | -0.2249        | -0.2246        | -0.4031        | 1.0514 |
| Am-4      | -0.4192        | -0.2382        | -0.2367        | -0.4211        | 1.0127 |
| Eu-4      | -0.4005        | -0.2319        | -0.2308        | -0.3990        | 1.0416 |
| Am-5      | -0.4199        | -0.2377        | -0.2319        | -0.4216        | 1.0117 |
| Eu-5      | -0.4008        | -0.2325        | -0.2319        | -0.4009        | 1.0417 |
| Am-6      | -0.4210        | -0.2398        | -0.2385        | -0.4214        | 1.0118 |
| Eu-6      | -0.4015        | -0.2342        | -0.2338        | -0.4015        | 1.0518 |

Supplementary Information Table 6: M and O Mulliken Charges of the  $M(\text{NO}_3)_3$  molecule and the complexes

|                            | $M^{3+}$ | $O_1$  | $O_3$  | $O_7$  | $O_9$  | $O_{10}$ | $O_{12}$ |
|----------------------------|----------|--------|--------|--------|--------|----------|----------|
| $\text{Am}(\text{NO}_3)_3$ | 1.557    | -0.541 | -0.540 | -0.541 | -0.541 | -0.541   | -0.542   |
| $\text{Eu}(\text{NO}_3)_3$ | 1.634    | -0.553 | -0.553 | -0.554 | -0.554 | -0.554   | -0.555   |
| Am-1                       | 1.571    | -0.543 | -0.545 | -0.536 | -0.535 | -0.514   | -0.525   |
| Eu-1                       | 1.574    | -0.542 | -0.548 | -0.554 | -0.555 | -0.550   | -0.541   |
| Am-2                       | 1.554    | -0.533 | -0.535 | -0.543 | -0.544 | -0.527   | -0.517   |
| Eu-2                       | 1.561    | -0.546 | -0.546 | -0.554 | -0.553 | -0.549   | -0.542   |
| Am-3                       | 1.548    | -0.520 | -0.525 | -0.533 | -0.535 | -0.545   | -0.542   |
| Eu-3                       | 1.555    | -0.545 | -0.547 | -0.550 | -0.543 | -0.552   | -0.554   |
| Am-4                       | 1.591    | -0.517 | -0.524 | -0.531 | -0.530 | -0.545   | -0.543   |
| Eu-4                       | 1.577    | -0.543 | -0.548 | -0.550 | -0.553 | -0.549   | -0.542   |
| Am-5                       | 1.576    | -0.524 | -0.528 | -0.529 | -0.528 | -0.543   | -0.540   |
| Eu-5                       | 1.565    | -0.544 | -0.548 | -0.550 | -0.552 | -0.548   | -0.542   |
| Am-6                       | 1.570    | -0.522 | -0.526 | -0.529 | -0.529 | -0.545   | -0.542   |
| Eu-6                       | 1.559    | -0.550 | -0.552 | -0.544 | -0.547 | -0.548   | -0.542   |



Supplementary Information Table 7: QTAIM analysis of electron density  $\rho$ (e/bohr<sup>3</sup>) at Metal – Oxygen Bond Critical Points of the M(NO<sub>3</sub>)<sub>3</sub> molecule and the complexes

|                                   | M-O <sub>1</sub> | M-O <sub>3</sub> | M-O <sub>7</sub> | M-O <sub>9</sub> | M-O <sub>10</sub> | M-O <sub>12</sub> |
|-----------------------------------|------------------|------------------|------------------|------------------|-------------------|-------------------|
| Eu(NO <sub>3</sub> ) <sub>3</sub> | 0.044            | 0.043            | 0.044            | 0.044            | 0.043             | 0.043             |
| Am(NO <sub>3</sub> ) <sub>3</sub> | 0.054            | 0.054            | 0.054            | 0.054            | 0.054             | 0.054             |
| Am-1                              | 0.029            | 0.037            | 0.043            | 0.040            | 0.046             | 0.045             |
| Eu-1                              | 0.027            | 0.029            | 0.029            | 0.025            | 0.036             | 0.036             |
| Am-2                              | 0.029            | 0.037            | 0.027            | 0.040            | 0.044             | 0.044             |
| Eu-2                              | 0.027            | 0.028            | 0.027            | 0.028            | 0.035             | 0.036             |
| Am-3                              | 0.040            | 0.043            | 0.036            | 0.030            | 0.044             | 0.043             |
| Eu-3                              | 0.027            | 0.029            | 0.029            | 0.027            | 0.035             | 0.035             |
| Am-4                              | 0.036            | 0.029            | 0.041            | 0.044            | 0.045             | 0.044             |
| Eu-4                              | 0.030            | 0.026            | 0.026            | 0.030            | 0.035             | 0.036             |
| Am-5                              | 0.037            | 0.031            | 0.040            | 0.043            | 0.043             | 0.043             |
| Eu-5                              | 0.026            | 0.030            | 0.030            | 0.026            | 0.036             | 0.035             |
| Am-6                              | 0.031            | 0.037            | 0.043            | 0.040            | 0.043             | 0.044             |
| Eu-6                              | 0.030            | 0.026            | 0.026            | 0.030            | 0.035             | 0.036             |

## Optimized Coordinates of 1 Ligand

|      |         |         |         |
|------|---------|---------|---------|
| 1 H  | 7.3302  | 34.6144 | 11.3410 |
| 2 N  | 8.0508  | 29.3821 | 11.3835 |
| 3 N  | 8.2211  | 30.6849 | 11.5874 |
| 4 C  | 7.4436  | 31.3520 | 12.4597 |
| 5 C  | 6.4431  | 30.6660 | 13.1856 |
| 6 N  | 6.2805  | 29.3538 | 12.9910 |
| 7 C  | 7.0772  | 28.7634 | 12.0810 |
| 8 N  | 7.4095  | 26.7642 | 10.7470 |
| 9 C  | 6.8622  | 27.3020 | 11.8350 |
| 10 C | 6.0894  | 26.5545 | 12.7569 |
| 11 H | 5.6970  | 27.0409 | 13.6483 |
| 12 C | 5.8547  | 25.2222 | 12.4951 |
| 13 H | 5.2747  | 24.6168 | 13.1915 |
| 14 C | 6.3785  | 24.6257 | 11.3238 |
| 15 C | 6.1517  | 23.2337 | 10.9939 |
| 16 H | 6.0322  | 33.3981 | 11.2375 |
| 17 C | 6.7966  | 22.6980 | 9.9047  |
| 18 H | 6.6289  | 21.6501 | 9.6447  |
| 19 C | 7.6410  | 23.4760 | 9.0590  |
| 20 C | 8.2861  | 22.9191 | 7.9302  |
| 21 H | 8.1591  | 21.8571 | 7.7086  |
| 22 C | 9.0604  | 23.7223 | 7.1235  |
| 23 H | 9.5788  | 23.3341 | 6.2488  |
| 24 C | 9.1764  | 25.1000 | 7.4455  |
| 25 C | 9.9961  | 25.9822 | 6.5549  |
| 26 N | 10.7448 | 25.3767 | 5.6148  |
| 27 C | 11.4753 | 26.1592 | 4.8151  |
| 28 C | 11.3982 | 27.5621 | 4.9660  |
| 29 N | 10.6357 | 28.0937 | 5.9396  |
| 30 N | 9.9299  | 27.3148 | 6.7533  |
| 31 N | 8.5856  | 25.6535 | 8.5042  |
| 32 C | 7.8375  | 24.8701 | 9.3072  |
| 33 C | 7.1954  | 25.4577 | 10.4871 |
| 34 C | 12.1644 | 28.5584 | 4.0992  |
| 35 C | 12.7004 | 27.8395 | 2.8406  |
| 36 H | 11.8711 | 27.7055 | 2.1270  |
| 37 H | 13.4296 | 28.4966 | 2.3419  |
| 38 C | 13.3365 | 26.4842 | 3.1523  |
| 39 H | 14.1748 | 26.6234 | 3.8539  |
| 40 H | 13.7713 | 26.0465 | 2.2401  |
| 41 C | 12.3396 | 25.4704 | 3.7600  |
| 42 C | 5.5435  | 31.3411 | 14.2203 |
| 43 C | 5.6122  | 32.8766 | 14.0541 |
| 44 H | 4.9903  | 33.1691 | 13.1927 |
| 45 H | 5.1514  | 33.3464 | 14.9371 |
| 46 C | 7.0362  | 33.3965 | 13.8573 |
| 47 H | 7.6562  | 33.1220 | 14.7263 |
| 48 H | 7.0375  | 34.4969 | 13.8162 |
| 49 C | 7.7048  | 32.8524 | 12.5751 |
| 50 C | 13.3257 | 29.1358 | 4.9448  |
| 51 H | 12.9298 | 29.6097 | 5.8527  |
| 52 H | 13.8727 | 29.8924 | 4.3627  |

|      |         |         |         |
|------|---------|---------|---------|
| 53 H | 14.0382 | 28.3579 | 5.2534  |
| 54 C | 11.2385 | 29.7167 | 3.6748  |
| 55 H | 10.3845 | 29.3467 | 3.0894  |
| 56 H | 11.7994 | 30.4275 | 3.0500  |
| 57 H | 10.8476 | 30.2462 | 4.5514  |
| 58 C | 11.3982 | 24.9028 | 2.6704  |
| 59 H | 10.6693 | 24.2153 | 3.1195  |
| 60 H | 11.9854 | 24.3504 | 1.9221  |
| 61 H | 10.8408 | 25.6961 | 2.1533  |
| 62 C | 13.1201 | 24.3048 | 4.4015  |
| 63 H | 13.7768 | 24.6646 | 5.2066  |
| 64 H | 13.7469 | 23.8168 | 3.6411  |
| 65 H | 12.4376 | 23.5595 | 4.8269  |
| 66 C | 6.0374  | 30.9173 | 15.6250 |
| 67 H | 6.0091  | 29.8240 | 15.7242 |
| 68 H | 5.3867  | 31.3550 | 16.3961 |
| 69 H | 7.0676  | 31.2475 | 15.8164 |
| 70 C | 4.0860  | 30.8725 | 14.0412 |
| 71 H | 3.7079  | 31.1307 | 13.0415 |
| 72 H | 3.4457  | 31.3657 | 14.7868 |
| 73 H | 4.0021  | 29.7865 | 14.1665 |
| 74 C | 9.2210  | 33.1292 | 12.6310 |
| 75 H | 9.6813  | 32.6292 | 13.4955 |
| 76 H | 9.3947  | 34.2110 | 12.7287 |
| 77 H | 9.7202  | 32.7685 | 11.7244 |
| 78 C | 7.1199  | 33.5347 | 11.3143 |
| 79 H | 7.5774  | 33.1115 | 10.4100 |
| 80 H | 5.4880  | 22.6277 | 11.5929 |

## Optimized Coordinates of 2 Ligand

|      |         |         |         |
|------|---------|---------|---------|
| 1 H  | 5.1826  | 19.8790 | 14.1342 |
| 2 N  | 7.7560  | 29.4430 | 11.1086 |
| 3 N  | 7.9698  | 30.7293 | 11.3631 |
| 4 C  | 7.3304  | 31.3482 | 12.3735 |
| 5 C  | 6.3753  | 30.6445 | 13.1403 |
| 6 N  | 6.1813  | 29.3435 | 12.9047 |
| 7 C  | 6.8924  | 28.7838 | 11.9086 |
| 8 N  | 7.3458  | 26.7539 | 10.6533 |
| 9 C  | 6.6943  | 27.3184 | 11.6686 |
| 10 C | 5.8409  | 26.5887 | 12.5320 |
| 11 H | 5.3479  | 27.1006 | 13.3566 |
| 12 C | 5.6650  | 25.2411 | 12.3065 |
| 13 H | 5.0263  | 24.6515 | 12.9635 |
| 14 C | 6.3236  | 24.6094 | 11.2235 |
| 15 C | 6.1821  | 23.1935 | 10.9595 |
| 16 H | 6.7719  | 21.2128 | 12.7609 |
| 17 C | 6.9206  | 22.6014 | 9.9488  |
| 18 H | 1.6867  | 20.3655 | 13.9516 |
| 19 C | 7.7777  | 23.4102 | 9.1093  |
| 20 C | 8.4823  | 22.8631 | 8.0094  |
| 21 H | 8.4014  | 21.7978 | 7.7966  |
| 22 C | 9.2506  | 23.6774 | 7.2070  |
| 23 H | 9.8003  | 23.2863 | 6.3530  |
| 24 C | 9.3112  | 25.0620 | 7.4993  |
| 25 C | 10.1254 | 25.9546 | 6.6136  |
| 26 N | 10.8115 | 25.3647 | 5.6174  |
| 27 C | 11.5173 | 26.1569 | 4.8055  |
| 28 C | 11.4756 | 27.5552 | 5.0011  |
| 29 N | 10.8024 | 28.0679 | 6.0484  |
| 30 N | 10.1263 | 27.2777 | 6.8760  |
| 31 N | 8.6574  | 25.6125 | 8.5209  |
| 32 C | 7.9068  | 24.8209 | 9.3143  |
| 33 C | 7.1775  | 25.4354 | 10.4248 |
| 34 C | 12.1959 | 28.5656 | 4.1119  |
| 35 C | 12.6678 | 27.8689 | 2.8154  |
| 36 H | 11.8063 | 27.7557 | 2.1371  |
| 37 H | 13.3792 | 28.5307 | 2.2977  |
| 38 C | 13.3046 | 26.5024 | 3.0706  |
| 39 H | 14.1710 | 26.6189 | 3.7418  |
| 40 H | 13.6991 | 26.0815 | 2.1325  |
| 41 C | 12.3226 | 25.4843 | 3.6948  |
| 42 C | 5.5523  | 31.2875 | 14.2558 |
| 43 C | 5.6754  | 32.8265 | 14.1762 |
| 44 H | 5.0243  | 33.1940 | 13.3664 |
| 45 H | 5.2794  | 33.2599 | 15.1079 |
| 46 C | 7.1087  | 33.3004 | 13.9348 |
| 47 H | 7.7604  | 32.9401 | 14.7476 |
| 48 H | 7.1582  | 34.3998 | 13.9683 |

|    |   |         |         |         |
|----|---|---------|---------|---------|
| 49 | C | 7.6811  | 32.8195 | 12.5821 |
| 50 | C | 13.3989 | 29.1328 | 4.9040  |
| 51 | H | 13.0502 | 29.5876 | 5.8404  |
| 52 | H | 13.9110 | 29.9020 | 4.3072  |
| 53 | H | 14.1295 | 28.3520 | 5.1585  |
| 54 | C | 11.2449 | 29.7273 | 3.7563  |
| 55 | H | 10.3621 | 29.3633 | 3.2109  |
| 56 | H | 11.7687 | 30.4512 | 3.1148  |
| 57 | H | 10.8995 | 30.2398 | 4.6618  |
| 58 | C | 11.3267 | 24.9568 | 2.6341  |
| 59 | H | 10.6102 | 24.2657 | 3.0974  |
| 60 | H | 11.8730 | 24.4183 | 1.8458  |
| 61 | H | 10.7563 | 25.7696 | 2.1638  |
| 62 | C | 13.1147 | 24.2932 | 4.2713  |
| 63 | H | 13.8107 | 24.6238 | 5.0558  |
| 64 | H | 13.7016 | 23.8173 | 3.4723  |
| 65 | H | 12.4413 | 23.5453 | 4.7067  |
| 66 | C | 6.0899  | 30.7604 | 15.6082 |
| 67 | H | 6.0337  | 29.6642 | 15.6380 |
| 68 | H | 5.4850  | 31.1646 | 16.4330 |
| 69 | H | 7.1366  | 31.0494 | 15.7756 |
| 70 | C | 4.0711  | 30.8840 | 14.1153 |
| 71 | H | 3.6607  | 31.2146 | 13.1503 |
| 72 | H | 3.4821  | 31.3548 | 14.9159 |
| 73 | H | 3.9503  | 29.7961 | 14.1829 |
| 74 | C | 9.2134  | 32.9996 | 12.5777 |
| 75 | H | 9.6825  | 32.4146 | 13.3821 |
| 76 | H | 9.4619  | 34.0595 | 12.7355 |
| 77 | H | 9.6425  | 32.6718 | 11.6236 |
| 78 | C | 7.0810  | 33.6320 | 11.4093 |
| 79 | H | 7.4700  | 33.2551 | 10.4541 |
| 80 | H | 7.3571  | 34.6923 | 11.5086 |
| 81 | H | 5.9845  | 33.5635 | 11.3785 |
| 82 | C | 5.2398  | 22.3924 | 11.7979 |
| 83 | C | 3.8550  | 22.6151 | 11.7245 |
| 84 | C | 2.9591  | 21.8650 | 12.4879 |
| 85 | C | 3.4405  | 20.8759 | 13.3537 |
| 86 | C | 4.8182  | 20.6478 | 13.4522 |
| 87 | C | 5.7007  | 21.3995 | 12.6792 |
| 88 | H | 3.4684  | 23.3811 | 11.0500 |
| 89 | H | 1.8844  | 22.0480 | 12.4070 |
| 90 | O | 2.6083  | 20.1002 | 14.1311 |
| 91 | H | 6.8567  | 21.5355 | 9.7870  |

### Optimized Coordinates of 3 Ligand

|      |         |         |         |
|------|---------|---------|---------|
| 1 H  | 7.3371  | 16.5533 | 9.0748  |
| 2 N  | 7.6939  | 29.3962 | 11.0727 |
| 3 N  | 7.9498  | 30.6794 | 11.2898 |
| 4 C  | 7.3407  | 31.3208 | 12.2984 |
| 5 C  | 6.3818  | 30.6391 | 13.0930 |
| 6 N  | 6.1576  | 29.3386 | 12.8816 |
| 7 C  | 6.8332  | 28.7529 | 11.8839 |
| 8 N  | 7.2732  | 26.7323 | 10.6165 |
| 9 C  | 6.6248  | 27.3002 | 11.6438 |
| 10 C | 5.7858  | 26.5653 | 12.5058 |
| 11 H | 5.2983  | 27.0812 | 13.3307 |
| 12 C | 5.6140  | 25.2164 | 12.2844 |
| 13 H | 4.9795  | 24.6260 | 12.9439 |
| 14 C | 6.2755  | 24.5821 | 11.2060 |
| 15 C | 6.1465  | 23.1627 | 10.9532 |
| 16 H | 6.7824  | 21.2162 | 12.7677 |
| 17 C | 6.8889  | 22.5705 | 9.9450  |
| 18 H | 8.8156  | 20.6736 | 10.3260 |
| 19 C | 7.7426  | 23.3813 | 9.1042  |
| 20 C | 8.4496  | 22.8365 | 8.0061  |
| 21 H | 8.3658  | 21.7722 | 7.7919  |
| 22 C | 9.2229  | 23.6504 | 7.2082  |
| 23 H | 9.7726  | 23.2655 | 6.3520  |
| 24 C | 9.2992  | 25.0270 | 7.5025  |
| 25 C | 10.1146 | 25.9166 | 6.6340  |
| 26 N | 10.7930 | 25.3638 | 5.6189  |
| 27 C | 11.5025 | 26.1825 | 4.8369  |
| 28 C | 11.4686 | 27.5815 | 5.0785  |
| 29 N | 10.7952 | 28.0611 | 6.1348  |
| 30 N | 10.1230 | 27.2312 | 6.9236  |
| 31 N | 8.6401  | 25.5794 | 8.5311  |
| 32 C | 7.8646  | 24.7873 | 9.3145  |
| 33 C | 7.1228  | 25.4007 | 10.4009 |
| 34 C | 12.1932 | 28.6163 | 4.2264  |
| 35 C | 12.6612 | 27.9594 | 2.9078  |
| 36 H | 11.8008 | 27.8761 | 2.2242  |
| 37 H | 13.3774 | 28.6347 | 2.4163  |
| 38 C | 13.2906 | 26.5824 | 3.1174  |
| 39 H | 14.1569 | 26.6703 | 3.7925  |
| 40 H | 13.6822 | 26.1898 | 2.1663  |
| 41 C | 12.3019 | 25.5488 | 3.7036  |
| 42 C | 5.5925  | 31.3131 | 14.2098 |
| 43 C | 5.7418  | 32.8483 | 14.1049 |
| 44 H | 5.0845  | 33.2158 | 13.3006 |
| 45 H | 5.3682  | 33.2994 | 15.0368 |
| 46 C | 7.1793  | 33.2920 | 13.8358 |
| 47 H | 7.8380  | 32.9335 | 14.6434 |
| 48 H | 7.2484  | 34.3901 | 13.8502 |

|    |   |         |         |         |
|----|---|---------|---------|---------|
| 49 | C | 7.7228  | 32.7846 | 12.4808 |
| 50 | C | 13.3998 | 29.1445 | 5.0418  |
| 51 | H | 13.0570 | 29.5820 | 5.9881  |
| 52 | H | 13.9201 | 29.9224 | 4.4645  |
| 53 | H | 14.1206 | 28.3491 | 5.2771  |
| 54 | C | 11.2480 | 29.7949 | 3.9106  |
| 55 | H | 10.3591 | 29.4544 | 3.3606  |
| 56 | H | 11.7776 | 30.5276 | 3.2850  |
| 57 | H | 10.9133 | 30.2938 | 4.8270  |
| 58 | C | 11.2976 | 25.0715 | 2.6256  |
| 59 | H | 10.5799 | 24.3628 | 3.0595  |
| 60 | H | 11.8422 | 24.5660 | 1.8151  |
| 61 | H | 10.7294 | 25.9052 | 2.1915  |
| 62 | C | 13.0847 | 24.3292 | 4.2332  |
| 63 | H | 13.7789 | 24.6202 | 5.0342  |
| 64 | H | 13.6724 | 23.8894 | 3.4149  |
| 65 | H | 12.4072 | 23.5630 | 4.6286  |
| 66 | C | 6.1484  | 30.7949 | 15.5596 |
| 67 | H | 6.0696  | 29.7011 | 15.6110 |
| 68 | H | 5.5663  | 31.2267 | 16.3864 |
| 69 | H | 7.2031  | 31.0652 | 15.7030 |
| 70 | C | 4.1019  | 30.9324 | 14.1011 |
| 71 | H | 3.6818  | 31.2454 | 13.1348 |
| 72 | H | 3.5369  | 31.4364 | 14.8982 |
| 73 | H | 3.9598  | 29.8497 | 14.2024 |
| 74 | C | 9.2589  | 32.9343 | 12.4503 |
| 75 | H | 9.7311  | 32.3446 | 13.2490 |
| 76 | H | 9.5238  | 33.9905 | 12.6020 |
| 77 | H | 9.6729  | 32.6035 | 11.4911 |
| 78 | C | 7.1162  | 33.5892 | 11.3041 |
| 79 | H | 7.4868  | 33.2008 | 10.3468 |
| 80 | H | 7.4110  | 34.6448 | 11.3913 |
| 81 | H | 6.0187  | 33.5373 | 11.2888 |
| 82 | C | 5.2209  | 22.3601 | 11.8062 |
| 83 | C | 3.8325  | 22.5609 | 11.7406 |
| 84 | C | 2.9563  | 21.8047 | 12.5200 |
| 85 | C | 3.4618  | 20.8346 | 13.3940 |
| 86 | C | 4.8446  | 20.6298 | 13.4833 |
| 87 | C | 5.7076  | 21.3845 | 12.6934 |
| 88 | H | 3.4261  | 23.3094 | 11.0581 |
| 89 | H | 1.8780  | 21.9670 | 12.4446 |
| 90 | O | 2.6526  | 20.0541 | 14.1866 |
| 91 | H | 5.2267  | 19.8762 | 14.1723 |
| 92 | H | 1.7235  | 20.2993 | 14.0151 |
| 93 | C | 6.7994  | 21.1050 | 9.6710  |
| 94 | C | 5.6265  | 20.5367 | 9.1451  |
| 95 | C | 5.5429  | 19.1743 | 8.8716  |
| 96 | C | 6.6411  | 18.3442 | 9.1293  |
| 97 | C | 7.8188  | 18.8900 | 9.6547  |
| 98 | C | 7.8928  | 20.2590 | 9.9159  |

|       |        |         |        |
|-------|--------|---------|--------|
| 99 H  | 4.7668 | 21.1756 | 8.9406 |
| 100 H | 4.6333 | 18.7375 | 8.4586 |
| 101 O | 6.5040 | 17.0058 | 8.8432 |
| 102 H | 8.6776 | 18.2462 | 9.8613 |



## Optimized Coordinates of 4 Ligand

|      |         |         |         |
|------|---------|---------|---------|
| 1 H  | 12.5239 | -2.5579 | 1.4124  |
| 2 H  | 11.3175 | -1.2441 | 1.3520  |
| 3 H  | 15.1227 | -1.5874 | 6.2823  |
| 4 H  | 14.0741 | -0.4057 | 7.1118  |
| 5 C  | 12.6213 | -2.6974 | 6.5743  |
| 6 H  | 12.4008 | -2.2679 | 7.5612  |
| 7 H  | 13.4231 | -3.4408 | 6.6915  |
| 8 H  | 11.7209 | -3.2178 | 6.2187  |
| 9 C  | 13.6427 | -0.2435 | 2.4366  |
| 10 H | 14.2280 | 0.3141  | 3.1807  |
| 11 N | 8.0003  | 5.2929  | 5.5862  |
| 12 N | 9.0002  | 2.8505  | 6.3787  |
| 13 N | 9.0965  | 6.5912  | 3.3780  |
| 14 N | 9.4880  | 7.0174  | 2.1641  |
| 15 N | 6.9828  | 7.7444  | 3.1818  |
| 16 N | 10.0284 | 1.1055  | 4.5023  |
| 17 N | 10.7296 | 0.4350  | 3.5727  |
| 18 N | 11.2639 | 0.0587  | 6.2941  |
| 19 H | 13.1293 | 0.4855  | 1.7947  |
| 20 H | 14.3417 | -0.8241 | 1.8165  |
| 21 C | 11.8370 | -1.9471 | 2.0167  |
| 22 C | 7.4758  | 6.4442  | 5.1747  |
| 23 C | 6.5850  | 7.2128  | 5.9615  |
| 24 H | 6.1871  | 8.1482  | 5.5703  |
| 25 C | 6.2631  | 6.7617  | 7.2240  |
| 26 H | 5.6139  | 7.3515  | 7.8708  |
| 27 C | 6.7912  | 5.5365  | 7.6961  |
| 28 C | 6.5096  | 5.0250  | 9.0223  |
| 29 H | 6.9360  | 3.4874  | 10.4394 |
| 30 C | 7.1384  | 3.8755  | 9.4387  |
| 31 H | 11.0842 | -2.6133 | 2.4612  |
| 32 C | 8.0099  | 3.1313  | 8.5876  |
| 33 C | 8.6316  | 1.9323  | 9.0084  |
| 34 H | 8.4774  | 1.5766  | 10.0293 |
| 35 C | 9.4161  | 1.2244  | 8.1232  |
| 36 H | 9.9190  | 0.3020  | 8.4098  |
| 37 C | 9.5509  | 1.7124  | 6.7979  |
| 38 C | 7.6699  | 4.8302  | 6.8101  |
| 39 C | 8.2572  | 3.5632  | 7.2488  |
| 40 C | 7.8751  | 6.9446  | 3.8232  |
| 41 C | 7.3854  | 8.1439  | 1.9831  |
| 42 C | 6.6037  | 9.0072  | 1.0115  |
| 43 C | 7.6862  | 9.3186  | -0.0792 |
| 44 H | 8.0623  | 10.3406 | 0.0750  |
| 45 H | 7.2572  | 9.2809  | -1.0905 |
| 46 C | 8.8798  | 8.3112  | 0.0754  |
| 47 C | 8.6348  | 7.7660  | 1.4679  |
| 48 C | 6.0713  | 10.2833 | 1.6845  |

|      |         |         |         |
|------|---------|---------|---------|
| 49 H | 5.3695  | 10.0324 | 2.4917  |
| 50 H | 5.5446  | 10.9092 | 0.9496  |
| 51 H | 6.8900  | 10.8772 | 2.1149  |
| 52 C | 5.4204  | 8.1888  | 0.4463  |
| 53 H | 5.7612  | 7.2720  | -0.0535 |
| 54 H | 4.8638  | 8.7915  | -0.2861 |
| 55 H | 4.7343  | 7.9003  | 1.2548  |
| 56 C | 10.2464 | 9.0099  | -0.0289 |
| 57 H | 10.3837 | 9.4312  | -1.0356 |
| 58 H | 11.0587 | 8.2967  | 0.1644  |
| 59 H | 10.3316 | 9.8278  | 0.7005  |
| 60 C | 8.8125  | 7.1582  | -0.9505 |
| 61 H | 7.8451  | 6.6383  | -0.9183 |
| 62 H | 9.5999  | 6.4201  | -0.7453 |
| 63 H | 8.9572  | 7.5497  | -1.9680 |
| 64 C | 10.3362 | 0.9217  | 5.8014  |
| 65 C | 11.9456 | -0.5894 | 5.3597  |
| 66 C | 13.0547 | -1.5978 | 5.5895  |
| 67 C | 13.2838 | -2.1554 | 4.1414  |
| 68 H | 14.3532 | -2.2941 | 3.9298  |
| 69 H | 12.8076 | -3.1439 | 4.0612  |
| 70 C | 12.6159 | -1.1866 | 3.1031  |
| 71 C | 11.6943 | -0.3798 | 3.9949  |
| 72 C | 14.3008 | -0.8704 | 6.1423  |
| 73 H | 14.6474 | -0.0818 | 5.4605  |
| 74 H | 5.8172  | 5.5383  | 9.6730  |

## Optimized Coordinates of 5 Ligand

|      |         |         |         |
|------|---------|---------|---------|
| 1 H  | 12.6000 | -2.4811 | 1.3492  |
| 2 H  | 11.3777 | -1.1817 | 1.2967  |
| 3 C  | 5.5679  | 5.7248  | 9.9411  |
| 4 C  | 4.1962  | 5.8082  | 9.6530  |
| 5 C  | 3.3305  | 6.5475  | 10.4612 |
| 6 C  | 3.8312  | 7.2302  | 11.5762 |
| 7 C  | 5.1963  | 7.1631  | 11.8782 |
| 8 C  | 6.0477  | 6.4163  | 11.0664 |
| 9 H  | 3.7966  | 5.2822  | 8.7842  |
| 10 H | 2.2646  | 6.5944  | 10.2226 |
| 11 N | 7.9873  | 5.2346  | 5.6249  |
| 12 N | 8.9661  | 2.7916  | 6.3940  |
| 13 N | 9.0942  | 6.5658  | 3.4410  |
| 14 N | 9.4941  | 7.0064  | 2.2351  |
| 15 N | 6.9672  | 7.6914  | 3.2276  |
| 16 N | 10.0108 | 1.0842  | 4.4781  |
| 17 N | 10.7349 | 0.4435  | 3.5445  |
| 18 N | 11.2290 | 0.0082  | 6.2644  |
| 19 O | 3.0312  | 7.9845  | 12.4075 |
| 20 H | 5.5755  | 7.7016  | 12.7471 |
| 21 H | 2.1160  | 7.9429  | 12.0723 |
| 22 C | 7.4537  | 6.3827  | 5.2160  |
| 23 C | 6.5410  | 7.1314  | 5.9969  |
| 24 H | 6.1273  | 8.0594  | 5.6043  |
| 25 C | 6.2181  | 6.6720  | 7.2558  |
| 26 H | 5.5487  | 7.2450  | 7.8965  |
| 27 C | 6.7667  | 5.4550  | 7.7293  |
| 28 C | 6.4896  | 4.9482  | 9.0570  |
| 29 H | 7.1105  | 6.3725  | 11.3069 |
| 30 C | 7.0980  | 3.7849  | 9.4968  |
| 31 H | 11.1462 | -2.5755 | 2.3754  |
| 32 C | 7.9599  | 3.0357  | 8.6066  |
| 33 C | 8.5459  | 1.8022  | 8.9826  |
| 34 H | 8.3674  | 1.4050  | 9.9812  |
| 35 C | 9.3251  | 1.1053  | 8.0834  |
| 36 H | 9.7927  | 0.1578  | 8.3474  |
| 37 C | 9.4979  | 1.6350  | 6.7821  |
| 38 C | 7.6494  | 4.7623  | 6.8429  |
| 39 C | 8.2229  | 3.4904  | 7.2764  |
| 40 C | 7.8630  | 6.9000  | 3.8746  |
| 41 C | 7.3785  | 8.1054  | 2.0370  |
| 42 C | 6.5963  | 8.9650  | 1.0625  |
| 43 C | 7.6867  | 9.2987  | -0.0137 |
| 44 H | 8.0459  | 10.3252 | 0.1503  |
| 45 H | 7.2700  | 9.2602  | -1.0301 |
| 46 C | 8.8930  | 8.3076  | 0.1490  |
| 47 C | 8.6392  | 7.7489  | 1.5345  |
| 48 C | 6.0392  | 10.2289 | 1.7390  |

|      |         |         |         |
|------|---------|---------|---------|
| 49 H | 5.3325  | 9.9623  | 2.5368  |
| 50 H | 5.5118  | 10.8529 | 1.0029  |
| 51 H | 6.8450  | 10.8307 | 2.1826  |
| 52 C | 5.4308  | 8.1348  | 0.4784  |
| 53 H | 5.7896  | 7.2264  | -0.0242 |
| 54 H | 4.8738  | 8.7349  | -0.2558 |
| 55 H | 4.7402  | 7.8308  | 1.2774  |
| 56 C | 10.2504 | 9.0267  | 0.0669  |
| 57 H | 10.3949 | 9.4563  | -0.9353 |
| 58 H | 11.0704 | 8.3241  | 0.2667  |
| 59 H | 10.3140 | 9.8410  | 0.8025  |
| 60 C | 8.8549  | 7.1609  | -0.8855 |
| 61 H | 7.8948  | 6.6270  | -0.8683 |
| 62 H | 9.6503  | 6.4328  | -0.6754 |
| 63 H | 9.0062  | 7.5612  | -1.8986 |
| 64 C | 10.3000 | 0.8724  | 5.7772  |
| 65 C | 11.9347 | -0.6081 | 5.3264  |
| 66 C | 13.0550 | -1.6049 | 5.5515  |
| 67 C | 13.3171 | -2.1244 | 4.0948  |
| 68 H | 14.3921 | -2.2398 | 3.8981  |
| 69 H | 12.8598 | -3.1186 | 3.9834  |
| 70 C | 12.6496 | -1.1426 | 3.0680  |
| 71 C | 11.7034 | -0.3687 | 3.9632  |
| 72 C | 14.2795 | -0.8696 | 6.1413  |
| 73 H | 14.6227 | -0.0593 | 5.4837  |
| 74 H | 15.1115 | -1.5757 | 6.2776  |
| 75 H | 14.0294 | -0.4318 | 7.1174  |
| 76 C | 12.6240 | -2.7330 | 6.5040  |
| 77 H | 12.3818 | -2.3296 | 7.4968  |
| 78 H | 13.4357 | -3.4664 | 6.6170  |
| 79 H | 11.7375 | -3.2592 | 6.1228  |
| 80 C | 13.6718 | -0.1714 | 2.4358  |
| 81 H | 14.2393 | 0.3781  | 3.1994  |
| 82 H | 13.1566 | 0.5642  | 1.8030  |
| 83 H | 14.3869 | -0.7287 | 1.8130  |
| 84 C | 11.8965 | -1.8911 | 1.9551  |
| 85 H | 6.9295  | 3.4358  | 10.5048 |

## Optimized Coordinates of 6 Ligand

|      |         |         |         |
|------|---------|---------|---------|
| 1 H  | 8.5084  | 2.9341  | 13.8888 |
| 2 H  | 5.4442  | 1.4791  | 14.8762 |
| 3 C  | 5.4822  | 5.6569  | 9.8813  |
| 4 C  | 4.1089  | 5.6577  | 9.5889  |
| 5 C  | 3.2041  | 6.3764  | 10.3720 |
| 6 C  | 3.6670  | 7.1231  | 11.4623 |
| 7 C  | 5.0336  | 7.1373  | 11.7671 |
| 8 C  | 5.9246  | 6.4083  | 10.9835 |
| 9 H  | 3.7382  | 5.0815  | 8.7394  |
| 10 H | 2.1377  | 6.3573  | 10.1325 |
| 11 N | 7.8433  | 5.1138  | 5.5418  |
| 12 N | 9.1125  | 2.8793  | 6.4403  |
| 13 N | 8.4561  | 5.9378  | 3.0315  |
| 14 N | 8.8051  | 6.2846  | 1.7832  |
| 15 N | 6.9773  | 7.8118  | 3.2636  |
| 16 N | 10.6214 | 1.5392  | 4.6365  |
| 17 N | 11.4002 | 0.9695  | 3.7048  |
| 18 N | 11.2881 | -0.0302 | 6.3234  |
| 19 O | 2.8304  | 7.8639  | 12.2660 |
| 20 H | 5.3823  | 7.7253  | 12.6163 |
| 21 H | 1.9176  | 7.7646  | 11.9355 |
| 22 C | 7.2529  | 6.2390  | 5.0984  |
| 23 C | 6.3736  | 6.9950  | 5.8984  |
| 24 H | 5.9407  | 7.9047  | 5.4872  |
| 25 C | 6.0906  | 6.5671  | 7.1782  |
| 26 H | 5.4170  | 7.1390  | 7.8143  |
| 27 C | 6.6874  | 5.3853  | 7.6803  |
| 28 C | 6.4444  | 4.9054  | 9.0214  |
| 29 H | 6.9877  | 6.4289  | 11.2257 |
| 30 C | 7.1186  | 3.7881  | 9.4921  |
| 31 H | 8.8770  | 3.7906  | 11.5820 |
| 32 C | 8.0326  | 3.0761  | 8.6270  |
| 33 C | 8.6931  | 1.8900  | 9.0313  |
| 34 H | 8.5245  | 1.4973  | 10.0326 |
| 35 C | 9.5300  | 1.2314  | 8.1544  |
| 36 H | 10.0446 | 0.3132  | 8.4307  |
| 37 C | 9.7201  | 1.7527  | 6.8596  |
| 38 C | 7.5889  | 4.7010  | 6.8126  |
| 39 C | 8.2713  | 3.5223  | 7.2938  |
| 40 C | 7.5742  | 6.6873  | 3.7255  |
| 41 C | 7.3242  | 8.1468  | 2.0303  |
| 42 C | 6.8077  | 9.3313  | 1.2418  |
| 43 C | 7.7638  | 9.3278  | -0.0006 |
| 44 H | 8.5265  | 10.1079 | 0.1362  |
| 45 H | 7.2189  | 9.5652  | -0.9245 |
| 46 C | 8.4784  | 7.9338  | -0.1010 |
| 47 C | 8.2443  | 7.3797  | 1.2864  |
| 48 C | 6.9061  | 10.6362 | 2.0512  |

|      |         |         |         |
|------|---------|---------|---------|
| 49 H | 6.2744  | 10.5867 | 2.9483  |
| 50 H | 6.5709  | 11.4851 | 1.4385  |
| 51 H | 7.9398  | 10.8302 | 2.3694  |
| 52 C | 5.3342  | 9.0728  | 0.8497  |
| 53 H | 5.2233  | 8.1518  | 0.2618  |
| 54 H | 4.9597  | 9.9116  | 0.2462  |
| 55 H | 4.7074  | 8.9824  | 1.7476  |
| 56 C | 9.9791  | 8.0697  | -0.4142 |
| 57 H | 10.1163 | 8.5218  | -1.4070 |
| 58 H | 10.4674 | 7.0865  | -0.4099 |
| 59 H | 10.4849 | 8.7044  | 0.3263  |
| 60 C | 7.8146  | 7.0055  | -1.1442 |
| 61 H | 6.7382  | 6.8845  | -0.9606 |
| 62 H | 8.2773  | 6.0100  | -1.1182 |
| 63 H | 7.9465  | 7.4256  | -2.1515 |
| 64 C | 10.5920 | 1.0495  | 5.8947  |
| 65 C | 12.0407 | -0.5987 | 5.3936  |
| 66 C | 12.9357 | -1.8061 | 5.5761  |
| 67 C | 13.3535 | -2.1198 | 4.0974  |
| 68 H | 14.4106 | -2.4119 | 4.0343  |
| 69 H | 12.7589 | -2.9700 | 3.7332  |
| 70 C | 13.0533 | -0.8699 | 3.1972  |
| 71 C | 12.1034 | -0.0911 | 4.0790  |
| 72 C | 14.1427 | -1.4139 | 6.4588  |
| 73 H | 14.7162 | -0.5853 | 6.0224  |
| 74 H | 14.8164 | -2.2757 | 6.5694  |
| 75 H | 13.8041 | -1.1052 | 7.4576  |
| 76 C | 12.1765 | -2.9750 | 6.2284  |
| 77 H | 11.8419 | -2.7061 | 7.2396  |
| 78 H | 12.8321 | -3.8543 | 6.3034  |
| 79 H | 11.2935 | -3.2557 | 5.6377  |
| 80 C | 14.3171 | -0.0201 | 2.9288  |
| 81 H | 14.8178 | 0.2766  | 3.8603  |
| 82 H | 14.0529 | 0.8936  | 2.3801  |
| 83 H | 15.0312 | -0.5972 | 2.3238  |
| 84 C | 12.4009 | -1.2582 | 1.8586  |
| 85 H | 13.0996 | -1.8626 | 1.2622  |
| 86 H | 12.1358 | -0.3629 | 1.2813  |
| 87 H | 11.4852 | -1.8454 | 2.0162  |
| 88 C | 6.8969  | 3.2777  | 10.8771 |
| 89 C | 5.6715  | 2.7029  | 11.2465 |
| 90 C | 5.4654  | 2.2137  | 12.5364 |
| 91 C | 6.4890  | 2.2989  | 13.4880 |
| 92 C | 7.7195  | 2.8690  | 13.1390 |
| 93 C | 7.9156  | 3.3454  | 11.8445 |
| 94 H | 4.8679  | 2.6307  | 10.5131 |
| 95 H | 4.5055  | 1.7641  | 12.8032 |
| 96 O | 6.3458  | 1.8389  | 14.7769 |

## Optimized Coordinates of Am-1

|      |         |         |         |
|------|---------|---------|---------|
| 1 Am | 8.7802  | 28.2486 | 8.9229  |
| 2 N  | 7.5890  | 29.4044 | 10.9737 |
| 3 N  | 7.8372  | 30.6887 | 11.1987 |
| 4 C  | 7.2806  | 31.3013 | 12.2537 |
| 5 C  | 6.4255  | 30.5741 | 13.1260 |
| 6 N  | 6.1761  | 29.2850 | 12.8785 |
| 7 C  | 6.7651  | 28.7410 | 11.8050 |
| 8 N  | 7.1809  | 26.7552 | 10.4847 |
| 9 C  | 6.5166  | 27.3040 | 11.5124 |
| 10 C | 5.6156  | 26.5716 | 12.3162 |
| 11 H | 5.1039  | 27.0832 | 13.1289 |
| 12 C | 5.4153  | 25.2351 | 12.0465 |
| 13 H | 4.7222  | 24.6425 | 12.6463 |
| 14 C | 6.1217  | 24.6190 | 10.9897 |
| 15 C | 5.9788  | 23.2288 | 10.6815 |
| 16 H | 5.2904  | 22.6307 | 11.2812 |
| 17 C | 6.6925  | 22.6588 | 9.6664  |
| 18 H | 6.5861  | 21.5965 | 9.4402  |
| 19 C | 7.5947  | 23.4384 | 8.8751  |
| 20 C | 8.3517  | 22.8792 | 7.8218  |
| 21 H | 8.2598  | 21.8142 | 7.6013  |
| 22 C | 9.1927  | 23.6823 | 7.0824  |
| 23 H | 9.7917  | 23.2953 | 6.2608  |
| 24 C | 9.2746  | 25.0573 | 7.3942  |
| 25 C | 10.1382 | 25.9467 | 6.5727  |
| 26 N | 10.8849 | 25.3959 | 5.6069  |
| 27 C | 11.6263 | 26.2201 | 4.8600  |
| 28 C | 11.5448 | 27.6210 | 5.0780  |
| 29 N | 10.8048 | 28.0986 | 6.0905  |
| 30 N | 10.1095 | 27.2635 | 6.8526  |
| 31 N | 8.5843  | 25.6150 | 8.3995  |
| 32 C | 7.7552  | 24.8326 | 9.1340  |
| 33 C | 7.0063  | 25.4362 | 10.2242 |
| 34 C | 12.2838 | 28.6606 | 4.2454  |
| 35 C | 12.8257 | 27.9945 | 2.9607  |
| 36 H | 11.9965 | 27.8693 | 2.2455  |
| 37 H | 13.5390 | 28.6831 | 2.4837  |
| 38 C | 13.4898 | 26.6431 | 3.2248  |
| 39 H | 14.3242 | 26.7736 | 3.9321  |
| 40 H | 13.9330 | 26.2453 | 2.2991  |
| 41 C | 12.5115 | 25.5885 | 3.7915  |
| 42 C | 5.8104  | 31.1800 | 14.3817 |
| 43 C | 5.8698  | 32.7222 | 14.3049 |
| 44 H | 5.0753  | 33.0753 | 13.6276 |
| 45 H | 5.6285  | 33.1303 | 15.2982 |
| 46 C | 7.2240  | 33.2494 | 13.8305 |
| 47 H | 8.0152  | 32.9264 | 14.5262 |
| 48 H | 7.2307  | 34.3496 | 13.8511 |
| 49 C | 7.5936  | 32.7849 | 12.4038 |

|    |   |         |         |         |
|----|---|---------|---------|---------|
| 50 | C | 13.4380 | 29.2315 | 5.1060  |
| 51 | H | 13.0422 | 29.6752 | 6.0284  |
| 52 | H | 13.9657 | 30.0125 | 4.5396  |
| 53 | H | 14.1669 | 28.4589 | 5.3882  |
| 54 | C | 11.3269 | 29.8114 | 3.8668  |
| 55 | H | 10.4720 | 29.4418 | 3.2828  |
| 56 | H | 11.8681 | 30.5460 | 3.2535  |
| 57 | H | 10.9404 | 30.3175 | 4.7586  |
| 58 | C | 11.5895 | 25.0372 | 2.6761  |
| 59 | H | 10.8726 | 24.3179 | 3.0934  |
| 60 | H | 12.1976 | 24.5248 | 1.9170  |
| 61 | H | 11.0195 | 25.8343 | 2.1795  |
| 62 | C | 13.3121 | 24.4193 | 4.4041  |
| 63 | H | 13.9503 | 24.7653 | 5.2293  |
| 64 | H | 13.9592 | 23.9772 | 3.6334  |
| 65 | H | 12.6442 | 23.6400 | 4.7902  |
| 66 | C | 6.6307  | 30.6549 | 15.5884 |
| 67 | H | 6.5974  | 29.5579 | 15.6247 |
| 68 | H | 6.2042  | 31.0494 | 16.5221 |
| 69 | H | 7.6849  | 30.9585 | 15.5357 |
| 70 | C | 4.3452  | 30.7272 | 14.5374 |
| 71 | H | 3.7387  | 31.0431 | 13.6769 |
| 72 | H | 3.9182  | 31.1822 | 15.4425 |
| 73 | H | 4.2731  | 29.6371 | 14.6274 |
| 74 | C | 9.0920  | 33.0507 | 12.1492 |
| 75 | H | 9.7200  | 32.4874 | 12.8539 |
| 76 | H | 9.2972  | 34.1218 | 12.2881 |
| 77 | H | 9.3831  | 32.7680 | 11.1315 |
| 78 | C | 6.7617  | 33.5448 | 11.3399 |
| 79 | H | 7.0135  | 33.1873 | 10.3330 |
| 80 | H | 6.9887  | 34.6193 | 11.3954 |
| 81 | H | 5.6804  | 33.4128 | 11.4857 |
| 82 | O | 9.4556  | 28.0071 | 10.8310 |
| 83 | N | 10.5182 | 27.4187 | 10.4045 |
| 84 | O | 11.3915 | 27.0200 | 11.1881 |
| 85 | O | 10.8394 | 27.1707 | 9.4794  |
| 86 | O | 7.2033  | 27.8494 | 6.8396  |
| 87 | N | 6.1550  | 28.4527 | 7.2821  |
| 88 | O | 6.2155  | 28.9160 | 8.4768  |
| 89 | O | 5.1370  | 28.5751 | 6.5875  |
| 90 | O | 8.7870  | 30.5583 | 7.8183  |
| 91 | O | 10.5713 | 30.0730 | 9.0004  |
| 92 | N | 9.9393  | 30.9248 | 8.2662  |
| 93 | O | 10.4145 | 32.0355 | 8.0058  |



## Optimized Coordinates of Eu-1

|    |    |         |         |         |
|----|----|---------|---------|---------|
| 1  | Eu | 8.3070  | 28.1040 | 8.6970  |
| 2  | N  | 7.3600  | 29.3660 | 10.6380 |
| 3  | N  | 7.7780  | 30.6100 | 10.8890 |
| 4  | C  | 7.4550  | 31.1890 | 12.0390 |
| 5  | C  | 6.6210  | 30.5170 | 12.9740 |
| 6  | N  | 6.1930  | 29.2860 | 12.7010 |
| 7  | C  | 6.5960  | 28.7480 | 11.5430 |
| 8  | N  | 6.8890  | 26.7620 | 10.2540 |
| 9  | C  | 6.2440  | 27.3370 | 11.2730 |
| 10 | C  | 5.3590  | 26.6310 | 12.0920 |
| 11 | H  | 4.8810  | 27.0720 | 12.7560 |
| 12 | C  | 5.2020  | 25.2790 | 11.9050 |
| 13 | H  | 4.6040  | 24.8000 | 12.4340 |
| 14 | C  | 5.9450  | 24.6210 | 10.9120 |
| 15 | C  | 5.9440  | 23.2050 | 10.7230 |
| 16 | H  | 5.4010  | 22.6730 | 11.2590 |
| 17 | C  | 6.7230  | 22.6250 | 9.7760  |
| 18 | H  | 6.7300  | 21.6990 | 9.6950  |
| 19 | C  | 7.5360  | 23.4130 | 8.8970  |
| 20 | C  | 8.3560  | 22.8700 | 7.8960  |
| 21 | H  | 8.4010  | 21.9470 | 7.7780  |
| 22 | C  | 9.0890  | 23.7000 | 7.0950  |
| 23 | H  | 9.6290  | 23.3500 | 6.4250  |
| 24 | C  | 9.0220  | 25.0910 | 7.2960  |
| 25 | C  | 9.8410  | 26.0270 | 6.4910  |
| 26 | N  | 10.7760 | 25.5070 | 5.6880  |
| 27 | C  | 11.5500 | 26.3820 | 5.0420  |
| 28 | C  | 11.2610 | 27.7600 | 5.1230  |
| 29 | N  | 10.3290 | 28.2100 | 5.9640  |
| 30 | N  | 9.6300  | 27.3310 | 6.6890  |
| 31 | N  | 8.2650  | 25.6330 | 8.2450  |
| 32 | C  | 7.5330  | 24.8140 | 9.0350  |
| 33 | C  | 6.7530  | 25.4290 | 10.0830 |
| 34 | C  | 11.9930 | 28.8250 | 4.3200  |
| 35 | C  | 12.9450 | 28.1440 | 3.3310  |
| 36 | H  | 12.4390 | 27.8880 | 2.5440  |
| 37 | H  | 13.6120 | 28.7900 | 3.0520  |
| 38 | C  | 13.6330 | 26.9640 | 3.8410  |
| 39 | H  | 14.1700 | 27.2270 | 4.6050  |
| 40 | H  | 14.2390 | 26.6400 | 3.1550  |
| 41 | C  | 12.7230 | 25.8100 | 4.2650  |
| 42 | C  | 6.2050  | 31.1150 | 14.3090 |
| 43 | C  | 6.4490  | 32.6140 | 14.2790 |
| 44 | H  | 5.7550  | 33.0350 | 13.7470 |
| 45 | H  | 6.3790  | 32.9610 | 15.1820 |
| 46 | C  | 7.7980  | 32.9910 | 13.7130 |
| 47 | H  | 8.4890  | 32.5710 | 14.2480 |
| 48 | H  | 7.9090  | 33.9510 | 13.7870 |

|    |   |         |         |         |
|----|---|---------|---------|---------|
| 49 | C | 7.9960  | 32.5860 | 12.2470 |
| 50 | C | 12.7440 | 29.7570 | 5.2780  |
| 51 | H | 12.1290 | 30.1180 | 5.9200  |
| 52 | H | 13.1450 | 30.4730 | 4.7790  |
| 53 | H | 13.4290 | 29.2610 | 5.7330  |
| 54 | C | 10.9610 | 29.6350 | 3.5310  |
| 55 | H | 10.4180 | 29.0390 | 3.0070  |
| 56 | H | 11.4130 | 30.2510 | 2.9490  |
| 57 | H | 10.4030 | 30.1220 | 4.1410  |
| 58 | C | 12.2210 | 24.9850 | 3.1060  |
| 59 | H | 11.6690 | 24.2750 | 3.4360  |
| 60 | H | 12.9680 | 24.6160 | 2.6300  |
| 61 | H | 11.7080 | 25.5410 | 2.5160  |
| 62 | C | 13.5170 | 24.8860 | 5.1990  |
| 63 | H | 13.8000 | 25.3800 | 5.9720  |
| 64 | H | 14.2870 | 24.5490 | 4.7360  |
| 65 | H | 12.9600 | 24.1520 | 5.4720  |
| 66 | C | 7.0120  | 30.4040 | 15.3930 |
| 67 | H | 6.7940  | 29.4710 | 15.3930 |
| 68 | H | 6.8020  | 30.7820 | 16.2500 |
| 69 | H | 7.9500  | 30.5120 | 15.2160 |
| 70 | C | 4.7140  | 30.8480 | 14.5580 |
| 71 | H | 4.1960  | 31.2530 | 13.8590 |
| 72 | H | 4.4590  | 31.2240 | 15.4040 |
| 73 | H | 4.5550  | 29.9020 | 14.5660 |
| 74 | C | 9.4750  | 32.6230 | 11.8950 |
| 75 | H | 9.9490  | 31.9880 | 12.4390 |
| 76 | H | 9.8200  | 33.5030 | 12.0590 |
| 77 | H | 9.5900  | 32.4010 | 10.9690 |
| 78 | C | 7.2090  | 33.5240 | 11.3230 |
| 79 | H | 7.3160  | 33.2420 | 10.4120 |
| 80 | H | 7.5380  | 34.4180 | 11.4200 |
| 81 | H | 6.2780  | 33.4960 | 11.5570 |
| 82 | O | 9.3293  | 27.7407 | 10.8052 |
| 83 | N | 10.3853 | 27.2357 | 10.3332 |
| 84 | O | 11.3133 | 26.8907 | 11.0472 |
| 85 | O | 10.7464 | 26.9633 | 9.2241  |
| 86 | O | 6.8910  | 27.7850 | 6.7470  |
| 87 | N | 5.8220  | 28.3090 | 7.1950  |
| 88 | O | 5.8650  | 28.6960 | 8.4030  |
| 89 | O | 4.8180  | 28.4140 | 6.5010  |
| 90 | O | 8.1920  | 30.2650 | 7.7030  |
| 91 | O | 9.9920  | 29.7800 | 8.7780  |
| 92 | N | 9.3300  | 30.6470 | 8.1110  |
| 93 | O | 9.7590  | 31.7550 | 7.8980  |

## Optimized Coordinates of Am-2

|      |         |         |         |
|------|---------|---------|---------|
| 1 Am | 8.8438  | 28.2202 | 8.9998  |
| 2 N  | 7.6586  | 29.3984 | 11.0414 |
| 3 N  | 7.9485  | 30.6684 | 11.2907 |
| 4 C  | 7.3508  | 31.3023 | 12.3108 |
| 5 C  | 6.3667  | 30.6293 | 13.0822 |
| 6 N  | 6.1036  | 29.3424 | 12.8347 |
| 7 C  | 6.7706  | 28.7617 | 11.8282 |
| 8 N  | 7.2086  | 26.7553 | 10.5436 |
| 9 C  | 6.5276  | 27.3213 | 11.5519 |
| 10 C | 5.6219  | 26.5985 | 12.3599 |
| 11 H | 5.0915  | 27.1248 | 13.1509 |
| 12 C | 5.4466  | 25.2524 | 12.1269 |
| 13 H | 4.7593  | 24.6642 | 12.7378 |
| 14 C | 6.1754  | 24.6186 | 11.0944 |
| 15 C | 6.0876  | 23.2162 | 10.8532 |
| 16 H | 5.4471  | 22.6211 | 11.5070 |
| 17 C | 6.8205  | 22.5899 | 9.8725  |
| 18 H | 8.8618  | 20.7623 | 9.8982  |
| 19 C | 7.6681  | 23.3951 | 9.0166  |
| 20 C | 8.3585  | 22.8565 | 7.9069  |
| 21 O | 10.5904 | 31.9713 | 8.1118  |
| 22 C | 9.1445  | 23.6688 | 7.1185  |
| 23 H | 9.6838  | 23.2877 | 6.2540  |
| 24 C | 9.2480  | 25.0385 | 7.4360  |
| 25 C | 10.0891 | 25.9262 | 6.5893  |
| 26 N | 10.7735 | 25.3765 | 5.5772  |
| 27 C | 11.5019 | 26.1957 | 4.8127  |
| 28 C | 11.4779 | 27.5925 | 5.0675  |
| 29 N | 10.8035 | 28.0671 | 6.1258  |
| 30 N | 10.1147 | 27.2361 | 6.8985  |
| 31 N | 8.5874  | 25.5905 | 8.4633  |
| 32 C | 7.7988  | 24.8022 | 9.2371  |
| 33 C | 7.0496  | 25.4289 | 10.3135 |
| 34 C | 12.2152 | 28.6296 | 4.2296  |
| 35 C | 12.6942 | 27.9792 | 2.9117  |
| 36 H | 11.8410 | 27.9048 | 2.2183  |
| 37 H | 13.4192 | 28.6541 | 2.4326  |
| 38 C | 13.3140 | 26.5976 | 3.1196  |
| 39 H | 14.1718 | 26.6765 | 3.8065  |
| 40 H | 13.7161 | 26.2096 | 2.1710  |
| 41 C | 12.3122 | 25.5653 | 3.6857  |
| 42 C | 5.5953  | 31.2963 | 14.2157 |
| 43 C | 5.7864  | 32.8289 | 14.1498 |
| 44 H | 5.1407  | 33.2349 | 13.3546 |
| 45 H | 5.4236  | 33.2663 | 15.0924 |
| 46 C | 7.2363  | 33.2398 | 13.8947 |
| 47 H | 7.8823  | 32.8438 | 14.6949 |
| 48 H | 7.3354  | 34.3348 | 13.9360 |

|    |   |         |         |         |
|----|---|---------|---------|---------|
| 49 | C | 7.7709  | 32.7506 | 12.5296 |
| 50 | C | 13.4154 | 29.1491 | 5.0601  |
| 51 | H | 13.0650 | 29.5818 | 6.0057  |
| 52 | H | 13.9436 | 29.9287 | 4.4924  |
| 53 | H | 14.1314 | 28.3500 | 5.2973  |
| 54 | C | 11.2766 | 29.8131 | 3.9121  |
| 55 | H | 10.3925 | 29.4791 | 3.3506  |
| 56 | H | 11.8146 | 30.5487 | 3.2971  |
| 57 | H | 10.9340 | 30.3066 | 4.8286  |
| 58 | C | 11.3198 | 25.1005 | 2.5911  |
| 59 | H | 10.5935 | 24.3920 | 3.0105  |
| 60 | H | 11.8727 | 24.5987 | 1.7840  |
| 61 | H | 10.7610 | 25.9400 | 2.1560  |
| 62 | C | 13.0814 | 24.3381 | 4.2176  |
| 63 | H | 13.7672 | 24.6202 | 5.0290  |
| 64 | H | 13.6769 | 23.8999 | 3.4041  |
| 65 | H | 12.3947 | 23.5732 | 4.5996  |
| 66 | C | 6.1388  | 30.7296 | 15.5512 |
| 67 | H | 6.0368  | 29.6366 | 15.5727 |
| 68 | H | 5.5651  | 31.1509 | 16.3892 |
| 69 | H | 7.1989  | 30.9736 | 15.7024 |
| 70 | C | 4.0951  | 30.9577 | 14.1005 |
| 71 | H | 3.6823  | 31.3036 | 13.1424 |
| 72 | H | 3.5445  | 31.4580 | 14.9100 |
| 73 | H | 3.9246  | 29.8773 | 14.1776 |
| 74 | C | 9.3103  | 32.8621 | 12.5069 |
| 75 | H | 9.7647  | 32.2448 | 13.2949 |
| 76 | H | 9.6009  | 33.9080 | 12.6809 |
| 77 | H | 9.7196  | 32.5407 | 11.5426 |
| 78 | C | 7.1894  | 33.5983 | 11.3706 |
| 79 | H | 7.5550  | 33.2245 | 10.4056 |
| 80 | H | 7.5100  | 34.6437 | 11.4847 |
| 81 | H | 6.0910  | 33.5742 | 11.3495 |
| 82 | O | 9.5023  | 27.9022 | 10.9328 |
| 83 | N | 10.5582 | 27.3300 | 10.4740 |
| 84 | O | 11.4369 | 26.8909 | 11.2289 |
| 85 | O | 10.8914 | 27.1134 | 9.5426  |
| 86 | O | 7.2282  | 27.8266 | 6.9228  |
| 87 | N | 6.2192  | 28.4918 | 7.3638  |
| 88 | O | 6.3321  | 29.0051 | 8.5347  |
| 89 | O | 5.1874  | 28.6243 | 6.6915  |
| 90 | O | 8.9716  | 30.5012 | 7.8257  |
| 91 | O | 10.6361 | 30.0428 | 9.1801  |
| 92 | N | 10.0819 | 30.8729 | 8.3642  |
| 93 | C | 6.7333  | 21.1160 | 9.7104  |
| 94 | C | 5.4845  | 20.4834 | 9.5622  |
| 95 | C | 5.3811  | 19.0998 | 9.4501  |
| 96 | C | 6.5374  | 18.3099 | 9.4938  |
| 97 | C | 7.7897  | 18.9180 | 9.6514  |
| 98 | C | 7.8818  | 20.3053 | 9.7525  |

|       |        |         |        |
|-------|--------|---------|--------|
| 99 H  | 4.5798 | 21.0911 | 9.5133 |
| 100 H | 4.4120 | 18.6168 | 9.3211 |
| 101 O | 6.3808 | 16.9501 | 9.3779 |
| 102 H | 8.6942 | 18.3068 | 9.7036 |
| 103 H | 7.2596 | 16.5293 | 9.4307 |
| 104 H | 8.2511 | 21.7984 | 7.6718 |

## Optimized Coordinates of Eu-2

|    |    |         |         |         |
|----|----|---------|---------|---------|
| 1  | Eu | 8.7878  | 28.2204 | 8.9796  |
| 2  | N  | 7.5937  | 29.4155 | 11.0006 |
| 3  | N  | 7.8900  | 30.6852 | 11.2438 |
| 4  | C  | 7.3346  | 31.3120 | 12.2915 |
| 5  | C  | 6.3727  | 30.6374 | 13.0891 |
| 6  | N  | 6.1126  | 29.3474 | 12.8541 |
| 7  | C  | 6.7492  | 28.7695 | 11.8268 |
| 8  | N  | 7.1838  | 26.7563 | 10.5504 |
| 9  | C  | 6.5278  | 27.3201 | 11.5758 |
| 10 | C  | 5.6705  | 26.5896 | 12.4280 |
| 11 | H  | 5.1607  | 27.1146 | 13.2332 |
| 12 | C  | 5.5168  | 25.2371 | 12.2172 |
| 13 | H  | 4.8681  | 24.6409 | 12.8617 |
| 14 | C  | 6.2140  | 24.6082 | 11.1614 |
| 15 | C  | 6.1320  | 23.2032 | 10.9198 |
| 16 | H  | 5.5195  | 22.5940 | 11.5871 |
| 17 | C  | 6.8186  | 22.6246 | 9.8904  |
| 18 | H  | 8.8725  | 20.8339 | 9.6453  |
| 19 | C  | 7.6353  | 23.4033 | 9.0079  |
| 20 | C  | 8.3662  | 22.8258 | 7.9234  |
| 21 | O  | 10.4758 | 31.9945 | 8.0794  |
| 22 | C  | 9.1866  | 23.6644 | 7.1807  |
| 23 | H  | 9.7570  | 23.2848 | 6.3355  |
| 24 | C  | 9.2574  | 25.0373 | 7.4738  |
| 25 | C  | 10.0948 | 25.9215 | 6.6181  |
| 26 | N  | 10.7995 | 25.3661 | 5.6228  |
| 27 | C  | 11.5172 | 26.1849 | 4.8481  |
| 28 | C  | 11.4688 | 27.5854 | 5.0791  |
| 29 | N  | 10.7733 | 28.0671 | 6.1199  |
| 30 | N  | 10.0909 | 27.2374 | 6.9002  |
| 31 | N  | 8.5694  | 25.6027 | 8.4769  |
| 32 | C  | 7.7744  | 24.8085 | 9.2365  |
| 33 | C  | 7.0422  | 25.4239 | 10.3354 |
| 34 | C  | 12.2007 | 28.6199 | 4.2329  |
| 35 | C  | 12.6950 | 27.9589 | 2.9263  |
| 36 | H  | 11.8467 | 27.8663 | 2.2289  |
| 37 | H  | 13.4150 | 28.6361 | 2.4429  |
| 38 | C  | 13.3294 | 26.5871 | 3.1540  |
| 39 | H  | 14.1846 | 26.6842 | 3.8419  |
| 40 | H  | 13.7381 | 26.1916 | 2.2113  |
| 41 | C  | 12.3379 | 25.5506 | 3.7305  |
| 42 | C  | 5.6167  | 31.3081 | 14.2309 |
| 43 | C  | 5.8178  | 32.8396 | 14.1641 |
| 44 | H  | 5.1645  | 33.2517 | 13.3784 |
| 45 | H  | 5.4713  | 33.2784 | 15.1121 |
| 46 | C  | 7.2673  | 33.2389 | 13.8891 |
| 47 | H  | 7.9219  | 32.8305 | 14.6759 |
| 48 | H  | 7.3780  | 34.3326 | 13.9366 |

|    |   |         |         |         |
|----|---|---------|---------|---------|
| 49 | C | 7.7748  | 32.7538 | 12.5121 |
| 50 | C | 13.3897 | 29.1605 | 5.0661  |
| 51 | H | 13.0281 | 29.5999 | 6.0045  |
| 52 | H | 13.9144 | 29.9391 | 4.4937  |
| 53 | H | 14.1119 | 28.3712 | 5.3173  |
| 54 | C | 11.2542 | 29.7909 | 3.8940  |
| 55 | H | 10.3758 | 29.4421 | 3.3325  |
| 56 | H | 11.7897 | 30.5224 | 3.2720  |
| 57 | H | 10.9029 | 30.2943 | 4.8017  |
| 58 | C | 11.3527 | 25.0627 | 2.6395  |
| 59 | H | 10.6316 | 24.3530 | 3.0657  |
| 60 | H | 11.9124 | 24.5557 | 1.8403  |
| 61 | H | 10.7876 | 25.8915 | 2.1919  |
| 62 | C | 13.1196 | 24.3381 | 4.2775  |
| 63 | H | 13.7989 | 24.6368 | 5.0884  |
| 64 | H | 13.7229 | 23.8987 | 3.4705  |
| 65 | H | 12.4400 | 23.5695 | 4.6645  |
| 66 | C | 6.1640  | 30.7381 | 15.5627 |
| 67 | H | 6.0574  | 29.6456 | 15.5843 |
| 68 | H | 5.5967  | 31.1617 | 16.4037 |
| 69 | H | 7.2259  | 30.9775 | 15.7083 |
| 70 | C | 4.1133  | 30.9791 | 14.1239 |
| 71 | H | 3.6970  | 31.3292 | 13.1688 |
| 72 | H | 3.5701  | 31.4814 | 14.9371 |
| 73 | H | 3.9368  | 29.8994 | 14.2004 |
| 74 | C | 9.3159  | 32.8429 | 12.4672 |
| 75 | H | 9.7737  | 32.2103 | 13.2410 |
| 76 | H | 9.6244  | 33.8826 | 12.6480 |
| 77 | H | 9.7050  | 32.5272 | 11.4926 |
| 78 | C | 7.1900  | 33.6183 | 11.3679 |
| 79 | H | 7.5346  | 33.2450 | 10.3952 |
| 80 | H | 7.5294  | 34.6575 | 11.4842 |
| 81 | H | 6.0910  | 33.6125 | 11.3636 |
| 82 | O | 9.9367  | 27.7354 | 11.3100 |
| 83 | N | 10.9986 | 27.1436 | 10.8854 |
| 84 | O | 11.8668 | 26.7365 | 11.6702 |
| 85 | O | 11.1086 | 26.9924 | 9.6169  |
| 86 | O | 7.2338  | 27.8457 | 6.8870  |
| 87 | N | 6.1740  | 28.4407 | 7.3137  |
| 88 | O | 6.2128  | 28.9065 | 8.5069  |
| 89 | O | 5.1662  | 28.5499 | 6.6014  |
| 90 | O | 8.8314  | 30.5384 | 7.8776  |
| 91 | O | 10.6049 | 30.0257 | 9.0645  |
| 92 | N | 9.9859  | 30.8878 | 8.3323  |
| 93 | C | 6.7437  | 21.1021 | 9.6715  |
| 94 | C | 5.4982  | 20.4692 | 9.5734  |
| 95 | C | 5.4301  | 19.0847 | 9.3743  |
| 96 | C | 6.6073  | 18.3330 | 9.2733  |
| 97 | C | 7.8528  | 18.9658 | 9.3713  |
| 98 | C | 7.9210  | 20.3504 | 9.5704  |

|       |        |         |        |
|-------|--------|---------|--------|
| 99 H  | 4.5987 | 21.0436 | 9.6507 |
| 100 H | 4.4785 | 18.6012 | 9.2994 |
| 101 O | 6.5392 | 16.9489 | 9.0743 |
| 102 H | 8.7523 | 18.3915 | 9.2941 |
| 103 H | 6.5236 | 16.5037 | 9.9246 |
| 104 H | 8.2832 | 21.7745 | 7.6900 |



### Optimized Coordinates of Am-3

|      |         |         |         |
|------|---------|---------|---------|
| 1 Am | 8.8604  | 28.2059 | 9.0316  |
| 2 N  | 7.6939  | 29.3962 | 11.0727 |
| 3 N  | 7.9498  | 30.6794 | 11.2898 |
| 4 C  | 7.3407  | 31.3208 | 12.2984 |
| 5 C  | 6.3818  | 30.6391 | 13.0930 |
| 6 N  | 6.1576  | 29.3386 | 12.8816 |
| 7 C  | 6.8332  | 28.7529 | 11.8839 |
| 8 N  | 7.2732  | 26.7323 | 10.6165 |
| 9 C  | 6.6248  | 27.3002 | 11.6438 |
| 10 C | 5.7858  | 26.5653 | 12.5058 |
| 11 H | 5.2983  | 27.0812 | 13.3307 |
| 12 C | 5.6140  | 25.2164 | 12.2844 |
| 13 H | 4.9795  | 24.6260 | 12.9439 |
| 14 C | 6.2755  | 24.5821 | 11.2060 |
| 15 C | 6.1465  | 23.1627 | 10.9532 |
| 16 H | 6.7824  | 21.2162 | 12.7677 |
| 17 C | 6.8889  | 22.5705 | 9.9450  |
| 18 H | 8.8156  | 20.6736 | 10.3260 |
| 19 C | 7.7426  | 23.3813 | 9.1042  |
| 20 C | 8.4496  | 22.8365 | 8.0061  |
| 21 O | 10.5412 | 31.9646 | 8.0385  |
| 22 C | 9.2229  | 23.6504 | 7.2082  |
| 23 H | 9.7726  | 23.2655 | 6.3520  |
| 24 C | 9.2992  | 25.0270 | 7.5025  |
| 25 C | 10.1146 | 25.9166 | 6.6340  |
| 26 N | 10.7930 | 25.3638 | 5.6189  |
| 27 C | 11.5025 | 26.1825 | 4.8369  |
| 28 C | 11.4686 | 27.5815 | 5.0785  |
| 29 N | 10.7952 | 28.0611 | 6.1348  |
| 30 N | 10.1230 | 27.2312 | 6.9236  |
| 31 N | 8.6401  | 25.5794 | 8.5311  |
| 32 C | 7.8646  | 24.7873 | 9.3145  |
| 33 C | 7.1228  | 25.4007 | 10.4009 |
| 34 C | 12.1932 | 28.6163 | 4.2264  |
| 35 C | 12.6612 | 27.9594 | 2.9078  |
| 36 H | 11.8008 | 27.8761 | 2.2242  |
| 37 H | 13.3774 | 28.6347 | 2.4163  |
| 38 C | 13.2906 | 26.5824 | 3.1174  |
| 39 H | 14.1569 | 26.6703 | 3.7925  |
| 40 H | 13.6822 | 26.1898 | 2.1663  |
| 41 C | 12.3019 | 25.5488 | 3.7036  |
| 42 C | 5.5925  | 31.3131 | 14.2098 |
| 43 C | 5.7418  | 32.8483 | 14.1049 |
| 44 H | 5.0845  | 33.2158 | 13.3006 |
| 45 H | 5.3682  | 33.2994 | 15.0368 |
| 46 C | 7.1793  | 33.2920 | 13.8358 |
| 47 H | 7.8380  | 32.9335 | 14.6434 |
| 48 H | 7.2484  | 34.3901 | 13.8502 |

|    |   |         |         |         |
|----|---|---------|---------|---------|
| 49 | C | 7.7228  | 32.7846 | 12.4808 |
| 50 | C | 13.3998 | 29.1445 | 5.0418  |
| 51 | H | 13.0570 | 29.5820 | 5.9881  |
| 52 | H | 13.9201 | 29.9224 | 4.4645  |
| 53 | H | 14.1206 | 28.3491 | 5.2771  |
| 54 | C | 11.2480 | 29.7949 | 3.9106  |
| 55 | H | 10.3591 | 29.4544 | 3.3606  |
| 56 | H | 11.7776 | 30.5276 | 3.2850  |
| 57 | H | 10.9133 | 30.2938 | 4.8270  |
| 58 | C | 11.2976 | 25.0715 | 2.6256  |
| 59 | H | 10.5799 | 24.3628 | 3.0595  |
| 60 | H | 11.8422 | 24.5660 | 1.8151  |
| 61 | H | 10.7294 | 25.9052 | 2.1915  |
| 62 | C | 13.0847 | 24.3292 | 4.2332  |
| 63 | H | 13.7789 | 24.6202 | 5.0342  |
| 64 | H | 13.6724 | 23.8894 | 3.4149  |
| 65 | H | 12.4072 | 23.5630 | 4.6286  |
| 66 | C | 6.1484  | 30.7949 | 15.5596 |
| 67 | H | 6.0696  | 29.7011 | 15.6110 |
| 68 | H | 5.5663  | 31.2267 | 16.3864 |
| 69 | H | 7.2031  | 31.0652 | 15.7030 |
| 70 | C | 4.1019  | 30.9324 | 14.1011 |
| 71 | H | 3.6818  | 31.2454 | 13.1348 |
| 72 | H | 3.5369  | 31.4364 | 14.8982 |
| 73 | H | 3.9598  | 29.8497 | 14.2024 |
| 74 | C | 9.2589  | 32.9343 | 12.4503 |
| 75 | H | 9.7311  | 32.3446 | 13.2490 |
| 76 | H | 9.5238  | 33.9905 | 12.6020 |
| 77 | H | 9.6729  | 32.6035 | 11.4911 |
| 78 | C | 7.1162  | 33.5892 | 11.3041 |
| 79 | H | 7.4868  | 33.2008 | 10.3468 |
| 80 | H | 7.4110  | 34.6448 | 11.3913 |
| 81 | H | 6.0187  | 33.5373 | 11.2888 |
| 82 | O | 10.0335 | 27.6644 | 11.3507 |
| 83 | N | 11.0966 | 27.1085 | 10.8872 |
| 84 | O | 11.9836 | 26.6815 | 11.6397 |
| 85 | O | 11.1903 | 27.0122 | 9.6104  |
| 86 | O | 7.2078  | 27.7731 | 7.0042  |
| 87 | N | 6.2046  | 28.4486 | 7.4435  |
| 88 | O | 6.3301  | 28.9817 | 8.6041  |
| 89 | O | 5.1668  | 28.5725 | 6.7785  |
| 90 | O | 8.9467  | 30.4606 | 7.7985  |
| 91 | O | 10.6194 | 30.0697 | 9.1634  |
| 92 | N | 10.0512 | 30.8654 | 8.3235  |
| 93 | C | 6.7994  | 21.1050 | 9.6710  |
| 94 | C | 5.6265  | 20.5367 | 9.1451  |
| 95 | C | 5.5429  | 19.1743 | 8.8716  |
| 96 | C | 6.6411  | 18.3442 | 9.1293  |
| 97 | C | 7.8188  | 18.8900 | 9.6547  |
| 98 | C | 7.8928  | 20.2590 | 9.9159  |

|       |        |         |         |
|-------|--------|---------|---------|
| 99 H  | 4.7668 | 21.1756 | 8.9406  |
| 100 H | 4.6333 | 18.7375 | 8.4586  |
| 101 O | 6.5040 | 17.0058 | 8.8432  |
| 102 H | 8.6776 | 18.2462 | 9.8613  |
| 103 H | 7.3371 | 16.5533 | 9.0748  |
| 104 H | 8.3658 | 21.7722 | 7.7919  |
| 105 C | 5.2209 | 22.3601 | 11.8062 |
| 106 C | 3.8325 | 22.5609 | 11.7406 |
| 107 C | 2.9563 | 21.8047 | 12.5200 |
| 108 C | 3.4618 | 20.8346 | 13.3940 |
| 109 C | 4.8446 | 20.6298 | 13.4833 |
| 110 C | 5.7076 | 21.3845 | 12.6934 |
| 111 H | 3.4261 | 23.3094 | 11.0581 |
| 112 H | 1.8780 | 21.9670 | 12.4446 |
| 113 O | 2.6526 | 20.0541 | 14.1866 |
| 114 H | 5.2267 | 19.8762 | 14.1723 |
| 115 H | 1.7235 | 20.2993 | 14.0151 |

## Optimized Coordinates of Eu-3

|    |    |         |         |         |
|----|----|---------|---------|---------|
| 1  | Eu | 8.8611  | 28.2107 | 9.0280  |
| 2  | N  | 7.6862  | 29.4015 | 11.0647 |
| 3  | N  | 7.9470  | 30.6829 | 11.2883 |
| 4  | C  | 7.3434  | 31.3209 | 12.3020 |
| 5  | C  | 6.3858  | 30.6376 | 13.0971 |
| 6  | N  | 6.1590  | 29.3385 | 12.8810 |
| 7  | C  | 6.8278  | 28.7560 | 11.8765 |
| 8  | N  | 7.2729  | 26.7334 | 10.6134 |
| 9  | C  | 6.6178  | 27.3038 | 11.6350 |
| 10 | C  | 5.7721  | 26.5710 | 12.4924 |
| 11 | H  | 5.2792  | 27.0886 | 13.3128 |
| 12 | C  | 5.6020  | 25.2216 | 12.2730 |
| 13 | H  | 4.9632  | 24.6327 | 12.9296 |
| 14 | C  | 6.2713  | 24.5844 | 11.2010 |
| 15 | C  | 6.1447  | 23.1647 | 10.9517 |
| 16 | H  | 6.7563  | 21.2098 | 12.7693 |
| 17 | C  | 6.8961  | 22.5692 | 9.9517  |
| 18 | H  | 8.8169  | 20.6722 | 10.3627 |
| 19 | C  | 7.7547  | 23.3783 | 9.1142  |
| 20 | C  | 8.4723  | 22.8302 | 8.0245  |
| 21 | O  | 10.5325 | 31.9754 | 8.0501  |
| 22 | C  | 9.2466  | 23.6429 | 7.2264  |
| 23 | H  | 9.8037  | 23.2554 | 6.3762  |
| 24 | C  | 9.3126  | 25.0219 | 7.5116  |
| 25 | C  | 10.1238 | 25.9116 | 6.6392  |
| 26 | N  | 10.8055 | 25.3587 | 5.6266  |
| 27 | C  | 11.5056 | 26.1792 | 4.8377  |
| 28 | C  | 11.4607 | 27.5790 | 5.0718  |
| 29 | N  | 10.7894 | 28.0584 | 6.1297  |
| 30 | N  | 10.1254 | 27.2273 | 6.9241  |
| 31 | N  | 8.6455  | 25.5771 | 8.5334  |
| 32 | C  | 7.8710  | 24.7858 | 9.3182  |
| 33 | C  | 7.1232  | 25.4016 | 10.3990 |
| 34 | C  | 12.1735 | 28.6154 | 4.2117  |
| 35 | C  | 12.6444 | 27.9553 | 2.8958  |
| 36 | H  | 11.7834 | 27.8609 | 2.2145  |
| 37 | H  | 13.3537 | 28.6341 | 2.3991  |
| 38 | C  | 13.2861 | 26.5850 | 3.1116  |
| 39 | H  | 14.1531 | 26.6839 | 3.7843  |
| 40 | H  | 13.6788 | 26.1905 | 2.1618  |
| 41 | C  | 12.3076 | 25.5461 | 3.7060  |
| 42 | C  | 5.6024  | 31.3082 | 14.2200 |
| 43 | C  | 5.7540  | 32.8435 | 14.1206 |
| 44 | H  | 5.0949  | 33.2153 | 13.3198 |
| 45 | H  | 5.3840  | 33.2917 | 15.0554 |
| 46 | C  | 7.1915  | 33.2858 | 13.8487 |
| 47 | H  | 7.8520  | 32.9227 | 14.6528 |
| 48 | H  | 7.2627  | 34.3837 | 13.8674 |

|    |   |         |         |         |
|----|---|---------|---------|---------|
| 49 | C | 7.7298  | 32.7829 | 12.4899 |
| 50 | C | 13.3771 | 29.1599 | 5.0209  |
| 51 | H | 13.0329 | 29.5987 | 5.9661  |
| 52 | H | 13.8880 | 29.9399 | 4.4382  |
| 53 | H | 14.1065 | 28.3729 | 5.2580  |
| 54 | C | 11.2164 | 29.7833 | 3.8916  |
| 55 | H | 10.3295 | 29.4315 | 3.3456  |
| 56 | H | 11.7376 | 30.5176 | 3.2609  |
| 57 | H | 10.8791 | 30.2839 | 4.8062  |
| 58 | C | 11.3050 | 25.0543 | 2.6327  |
| 59 | H | 10.5940 | 24.3424 | 3.0722  |
| 60 | H | 11.8522 | 24.5483 | 1.8243  |
| 61 | H | 10.7294 | 25.8808 | 2.1947  |
| 62 | C | 13.1022 | 24.3363 | 4.2404  |
| 63 | H | 13.7950 | 24.6376 | 5.0388  |
| 64 | H | 13.6925 | 23.8976 | 3.4234  |
| 65 | H | 12.4322 | 23.5661 | 4.6407  |
| 66 | C | 6.1630  | 30.7834 | 15.5653 |
| 67 | H | 6.0816  | 29.6895 | 15.6127 |
| 68 | H | 5.5859  | 31.2135 | 16.3965 |
| 69 | H | 7.2192  | 31.0502 | 15.7050 |
| 70 | C | 4.1107  | 30.9305 | 14.1160 |
| 71 | H | 3.6869  | 31.2491 | 13.1531 |
| 72 | H | 3.5500  | 31.4314 | 14.9181 |
| 73 | H | 3.9673  | 29.8476 | 14.2125 |
| 74 | C | 9.2661  | 32.9291 | 12.4553 |
| 75 | H | 9.7395  | 32.3347 | 13.2498 |
| 76 | H | 9.5339  | 33.9840 | 12.6110 |
| 77 | H | 9.6764  | 32.6018 | 11.4934 |
| 78 | C | 7.1215  | 33.5940 | 11.3186 |
| 79 | H | 7.4879  | 33.2087 | 10.3585 |
| 80 | H | 7.4195  | 34.6485 | 11.4092 |
| 81 | H | 6.0238  | 33.5454 | 11.3067 |
| 82 | O | 10.0349 | 27.6902 | 11.3566 |
| 83 | N | 11.0970 | 27.1323 | 10.8937 |
| 84 | O | 11.9889 | 26.7150 | 11.6458 |
| 85 | O | 11.1846 | 27.0232 | 9.6172  |
| 86 | O | 7.2200  | 27.7643 | 6.9871  |
| 87 | N | 6.2089  | 28.4259 | 7.4285  |
| 88 | O | 6.3282  | 28.9580 | 8.5902  |
| 89 | O | 5.1696  | 28.5397 | 6.7638  |
| 90 | O | 8.9380  | 30.4714 | 7.8086  |
| 91 | O | 10.6205 | 30.0714 | 9.1590  |
| 92 | N | 10.0451 | 30.8740 | 8.3305  |
| 93 | C | 6.8096  | 21.1032 | 9.6797  |
| 94 | C | 5.6445  | 20.5343 | 9.1377  |
| 95 | C | 5.5647  | 19.1715 | 8.8643  |
| 96 | C | 6.6591  | 18.3416 | 9.1380  |
| 97 | C | 7.8292  | 18.8880 | 9.6794  |
| 98 | C | 7.8997  | 20.2573 | 9.9403  |

|       |        |         |         |
|-------|--------|---------|---------|
| 99 H  | 4.7874 | 21.1725 | 8.9203  |
| 100 H | 4.6603 | 18.7357 | 8.4390  |
| 101 O | 6.5265 | 17.0030 | 8.8505  |
| 102 H | 8.6857 | 18.2452 | 9.8987  |
| 103 H | 7.3567 | 16.5512 | 9.0935  |
| 104 H | 8.3952 | 21.7642 | 7.8161  |
| 105 C | 5.2094 | 22.3650 | 11.7972 |
| 106 C | 3.8226 | 22.5746 | 11.7223 |
| 107 C | 2.9360 | 21.8228 | 12.4940 |
| 108 C | 3.4292 | 20.8479 | 13.3699 |
| 109 C | 4.8097 | 20.6343 | 13.4684 |
| 110 C | 5.6834 | 21.3850 | 12.6862 |
| 111 H | 3.4258 | 23.3273 | 11.0388 |
| 112 H | 1.8596 | 21.9932 | 12.4113 |
| 113 O | 2.6096 | 20.0722 | 14.1565 |
| 114 H | 5.1832 | 19.8774 | 14.1586 |
| 115 H | 1.6832 | 20.3221 | 13.9780 |

## Optimized Coordinates of Am-4

|      |         |         |         |
|------|---------|---------|---------|
| 1 Am | 9.4574  | 3.7660  | 3.8725  |
| 2 O  | 11.3491 | 4.0526  | 2.1631  |
| 3 O  | 9.5859  | 2.9588  | 1.4513  |
| 4 O  | 11.2923 | 3.2916  | 0.0944  |
| 5 O  | 6.9095  | 3.5081  | 3.0310  |
| 6 O  | 7.7976  | 1.7120  | 3.9129  |
| 7 O  | 5.7322  | 1.6493  | 3.1492  |
| 8 O  | 10.5631 | 5.7204  | 4.6909  |
| 9 O  | 11.6392 | 3.8768  | 5.1769  |
| 10 O | 12.4667 | 5.8226  | 5.7960  |
| 11 N | 7.8019  | 5.1690  | 5.4628  |
| 12 N | 9.0785  | 2.9045  | 6.3851  |
| 13 N | 8.3891  | 5.9984  | 2.9366  |
| 14 N | 8.7291  | 6.3588  | 1.6896  |
| 15 N | 6.9260  | 7.8789  | 3.2042  |
| 16 N | 10.6511 | 1.5390  | 4.6280  |
| 17 N | 11.4403 | 0.9378  | 3.7254  |
| 18 N | 11.2880 | 0.0199  | 6.3699  |
| 19 N | 10.7597 | 3.4301  | 1.2008  |
| 20 N | 6.7821  | 2.2738  | 3.3547  |
| 21 N | 11.5853 | 5.1569  | 5.2360  |
| 22 C | 7.2016  | 6.2843  | 5.0220  |
| 23 C | 6.2977  | 7.0271  | 5.8140  |
| 24 H | 5.8431  | 7.9209  | 5.3916  |
| 25 C | 6.0218  | 6.5967  | 7.0940  |
| 26 H | 5.3243  | 7.1461  | 7.7289  |
| 27 C | 6.6503  | 5.4352  | 7.5947  |
| 28 C | 6.4131  | 4.9460  | 8.9186  |
| 29 H | 5.7156  | 5.4905  | 9.5575  |
| 30 C | 7.0440  | 3.8240  | 9.3748  |
| 31 H | 6.8609  | 3.4549  | 10.3853 |
| 32 C | 7.9602  | 3.1063  | 8.5418  |
| 33 C | 8.6335  | 1.9460  | 8.9840  |
| 34 H | 8.4594  | 1.5767  | 9.9961  |
| 35 C | 9.4980  | 1.2904  | 8.1340  |
| 36 H | 10.0350 | 0.3922  | 8.4315  |
| 37 C | 9.6930  | 1.7987  | 6.8304  |
| 38 C | 7.5496  | 4.7473  | 6.7262  |
| 39 C | 8.2220  | 3.5534  | 7.2125  |
| 40 C | 7.5194  | 6.7439  | 3.6431  |
| 41 C | 7.2715  | 8.2338  | 1.9746  |
| 42 C | 6.7651  | 9.4374  | 1.2084  |
| 43 C | 7.7127  | 9.4419  | -0.0405 |
| 44 H | 8.4834  | 10.2133 | 0.1003  |
| 45 H | 7.1634  | 9.6966  | -0.9571 |
| 46 C | 8.4134  | 8.0429  | -0.1649 |
| 47 C | 8.1790  | 7.4698  | 1.2142  |
| 48 C | 6.8862  | 10.7283 | 2.0368  |

|      |         |         |         |
|------|---------|---------|---------|
| 49 H | 6.2599  | 10.6743 | 2.9375  |
| 50 H | 6.5584  | 11.5902 | 1.4385  |
| 51 H | 7.9246  | 10.9043 | 2.3500  |
| 52 C | 5.2861  | 9.2033  | 0.8212  |
| 53 H | 5.1600  | 8.2905  | 0.2237  |
| 54 H | 4.9208  | 10.0536 | 0.2283  |
| 55 H | 4.6621  | 9.1117  | 1.7208  |
| 56 C | 9.9141  | 8.1674  | -0.4818 |
| 57 H | 10.0522 | 8.6286  | -1.4702 |
| 58 H | 10.3929 | 7.1794  | -0.4899 |
| 59 H | 10.4295 | 8.7894  | 0.2631  |
| 60 C | 7.7363  | 7.1357  | -1.2183 |
| 61 H | 6.6602  | 7.0195  | -1.0300 |
| 62 H | 8.1924  | 6.1367  | -1.2107 |
| 63 H | 7.8653  | 7.5712  | -2.2194 |
| 64 C | 10.5981 | 1.0826  | 5.8928  |
| 65 C | 12.0669 | -0.5691 | 5.4740  |
| 66 C | 12.9689 | -1.7613 | 5.7113  |
| 67 C | 13.4128 | -2.1207 | 4.2503  |
| 68 H | 14.4742 | -2.4012 | 4.2134  |
| 69 H | 12.8348 | -2.9909 | 3.9072  |
| 70 C | 13.1110 | -0.9066 | 3.3030  |
| 71 C | 12.1456 | -0.1052 | 4.1456  |
| 72 C | 14.1585 | -1.3271 | 6.5982  |
| 73 H | 14.7327 | -0.5104 | 6.1406  |
| 74 H | 14.8367 | -2.1788 | 6.7506  |
| 75 H | 13.8019 | -0.9850 | 7.5797  |
| 76 C | 12.2094 | -2.9135 | 6.3917  |
| 77 H | 11.8576 | -2.6137 | 7.3883  |
| 78 H | 12.8708 | -3.7842 | 6.5058  |
| 79 H | 11.3374 | -3.2213 | 5.7981  |
| 80 C | 14.3684 | -0.0520 | 3.0182  |
| 81 H | 14.8592 | 0.2774  | 3.9440  |
| 82 H | 14.0987 | 0.8420  | 2.4404  |
| 83 H | 15.0920 | -0.6405 | 2.4362  |
| 84 C | 12.4756 | -1.3465 | 1.9722  |
| 85 H | 13.1848 | -1.9662 | 1.4049  |
| 86 H | 12.2104 | -0.4738 | 1.3614  |
| 87 H | 11.5624 | -1.9348 | 2.1404  |



## Optimized Coordinates of Eu-4

|    |    |         |         |         |
|----|----|---------|---------|---------|
| 1  | Eu | 11.0796 | 3.3712  | 0.8328  |
| 2  | O  | 12.9821 | 3.6983  | -0.8573 |
| 3  | O  | 11.2528 | 2.5615  | -1.5848 |
| 4  | O  | 12.9651 | 2.9312  | -2.9245 |
| 5  | O  | 8.5476  | 3.0513  | -0.0348 |
| 6  | O  | 9.4684  | 1.2788  | 0.8612  |
| 7  | O  | 7.4132  | 1.1655  | 0.0759  |
| 8  | O  | 12.2366 | 5.5539  | 1.7411  |
| 9  | O  | 13.3507 | 3.7374  | 2.2434  |
| 10 | O  | 14.1255 | 5.7037  | 2.8660  |
| 11 | N  | 7.8019  | 5.1690  | 5.4628  |
| 12 | N  | 9.0785  | 2.9045  | 6.3851  |
| 13 | N  | 8.3891  | 5.9984  | 2.9366  |
| 14 | N  | 8.7291  | 6.3588  | 1.6896  |
| 15 | N  | 6.9260  | 7.8789  | 3.2042  |
| 16 | N  | 10.6511 | 1.5390  | 4.6280  |
| 17 | N  | 11.4403 | 0.9378  | 3.7254  |
| 18 | N  | 11.2880 | 0.0199  | 6.3699  |
| 19 | N  | 12.4178 | 3.0598  | -1.8242 |
| 20 | N  | 8.4459  | 1.8151  | 0.2909  |
| 21 | N  | 13.2660 | 5.0160  | 2.2985  |
| 22 | C  | 7.2016  | 6.2843  | 5.0220  |
| 23 | C  | 6.2977  | 7.0271  | 5.8140  |
| 24 | H  | 5.8431  | 7.9209  | 5.3916  |
| 25 | C  | 6.0218  | 6.5967  | 7.0940  |
| 26 | H  | 5.3243  | 7.1461  | 7.7289  |
| 27 | C  | 6.6503  | 5.4352  | 7.5947  |
| 28 | C  | 6.4131  | 4.9460  | 8.9186  |
| 29 | H  | 5.7156  | 5.4905  | 9.5575  |
| 30 | C  | 7.0440  | 3.8240  | 9.3748  |
| 31 | H  | 6.8609  | 3.4549  | 10.3853 |
| 32 | C  | 7.9602  | 3.1063  | 8.5418  |
| 33 | C  | 8.6335  | 1.9460  | 8.9840  |
| 34 | H  | 8.4594  | 1.5767  | 9.9961  |
| 35 | C  | 9.4980  | 1.2904  | 8.1340  |
| 36 | H  | 10.0350 | 0.3922  | 8.4315  |
| 37 | C  | 9.6930  | 1.7987  | 6.8304  |
| 38 | C  | 7.5496  | 4.7473  | 6.7262  |
| 39 | C  | 8.2220  | 3.5534  | 7.2125  |
| 40 | C  | 7.5194  | 6.7439  | 3.6431  |
| 41 | C  | 7.2715  | 8.2338  | 1.9746  |
| 42 | C  | 6.7651  | 9.4374  | 1.2084  |
| 43 | C  | 7.7127  | 9.4419  | -0.0405 |
| 44 | H  | 8.4834  | 10.2133 | 0.1003  |
| 45 | H  | 7.1634  | 9.6966  | -0.9571 |
| 46 | C  | 8.4134  | 8.0429  | -0.1649 |
| 47 | C  | 8.1790  | 7.4698  | 1.2142  |
| 48 | C  | 6.8862  | 10.7283 | 2.0368  |

|    |   |         |         |         |
|----|---|---------|---------|---------|
| 49 | H | 6.2599  | 10.6743 | 2.9375  |
| 50 | H | 6.5584  | 11.5902 | 1.4385  |
| 51 | H | 7.9246  | 10.9043 | 2.3500  |
| 52 | C | 5.2861  | 9.2033  | 0.8212  |
| 53 | H | 5.1600  | 8.2905  | 0.2237  |
| 54 | H | 4.9208  | 10.0536 | 0.2283  |
| 55 | H | 4.6621  | 9.1117  | 1.7208  |
| 56 | C | 9.9141  | 8.1674  | -0.4818 |
| 57 | H | 10.0522 | 8.6286  | -1.4702 |
| 58 | H | 10.3929 | 7.1794  | -0.4899 |
| 59 | H | 10.4295 | 8.7894  | 0.2631  |
| 60 | C | 7.7363  | 7.1357  | -1.2183 |
| 61 | H | 6.6602  | 7.0195  | -1.0300 |
| 62 | H | 8.1924  | 6.1367  | -1.2107 |
| 63 | H | 7.8653  | 7.5712  | -2.2194 |
| 64 | C | 10.5981 | 1.0826  | 5.8928  |
| 65 | C | 12.0669 | -0.5691 | 5.4740  |
| 66 | C | 12.9689 | -1.7613 | 5.7113  |
| 67 | C | 13.4128 | -2.1207 | 4.2503  |
| 68 | H | 14.4742 | -2.4012 | 4.2134  |
| 69 | H | 12.8348 | -2.9909 | 3.9072  |
| 70 | C | 13.1110 | -0.9066 | 3.3030  |
| 71 | C | 12.1456 | -0.1052 | 4.1456  |
| 72 | C | 14.1585 | -1.3271 | 6.5982  |
| 73 | H | 14.7327 | -0.5104 | 6.1406  |
| 74 | H | 14.8367 | -2.1788 | 6.7506  |
| 75 | H | 13.8019 | -0.9850 | 7.5797  |
| 76 | C | 12.2094 | -2.9135 | 6.3917  |
| 77 | H | 11.8576 | -2.6137 | 7.3883  |
| 78 | H | 12.8708 | -3.7842 | 6.5058  |
| 79 | H | 11.3374 | -3.2213 | 5.7981  |
| 80 | C | 14.3684 | -0.0520 | 3.0182  |
| 81 | H | 14.8592 | 0.2774  | 3.9440  |
| 82 | H | 14.0987 | 0.8420  | 2.4404  |
| 83 | H | 15.0920 | -0.6405 | 2.4362  |
| 84 | C | 12.4756 | -1.3465 | 1.9722  |
| 85 | H | 13.1848 | -1.9662 | 1.4049  |
| 86 | H | 12.2104 | -0.4738 | 1.3614  |
| 87 | H | 11.5624 | -1.9348 | 2.1404  |

## Optimized Coordinates of Am-5

|      |         |         |         |
|------|---------|---------|---------|
| 1 Am | 9.5677  | 3.5827  | 3.9334  |
| 2 O  | 11.4793 | 3.8815  | 2.2473  |
| 3 O  | 9.7260  | 2.7952  | 1.4997  |
| 4 O  | 11.4589 | 3.1243  | 0.1768  |
| 5 O  | 7.0295  | 3.3249  | 3.0515  |
| 6 O  | 7.9086  | 1.5319  | 3.9483  |
| 7 O  | 5.8478  | 1.4687  | 3.1714  |
| 8 O  | 10.7787 | 5.7262  | 4.8696  |
| 9 O  | 11.8450 | 3.8758  | 5.3512  |
| 10 O | 12.5780 | 5.9861  | 5.9425  |
| 11 N | 7.8083  | 5.1240  | 5.4645  |
| 12 N | 9.0827  | 2.8617  | 6.3808  |
| 13 N | 8.4105  | 5.9898  | 2.9508  |
| 14 N | 8.7628  | 6.3718  | 1.7134  |
| 15 N | 6.9011  | 7.8338  | 3.2153  |
| 16 N | 10.6598 | 1.5185  | 4.6053  |
| 17 N | 11.4518 | 0.9306  | 3.6961  |
| 18 N | 11.2710 | -0.0406 | 6.3200  |
| 19 N | 10.9056 | 3.2627  | 1.2735  |
| 20 N | 6.8975  | 2.0927  | 3.3807  |
| 21 N | 11.7930 | 5.1552  | 5.4216  |
| 22 C | 7.1889  | 6.2290  | 5.0217  |
| 23 C | 6.2613  | 6.9492  | 5.8077  |
| 24 H | 5.7909  | 7.8339  | 5.3836  |
| 25 C | 5.9869  | 6.5122  | 7.0847  |
| 26 H | 5.2759  | 7.0463  | 7.7176  |
| 27 C | 6.6393  | 5.3637  | 7.5879  |
| 28 C | 6.4298  | 4.8929  | 8.9169  |
| 29 H | 5.7514  | 5.4549  | 9.5617  |
| 30 C | 7.0857  | 3.7952  | 9.4223  |
| 31 H | 8.9383  | 3.4507  | 11.4163 |
| 32 C | 7.9902  | 3.0648  | 8.5570  |
| 33 C | 8.6271  | 1.8683  | 8.9581  |
| 34 H | 8.4336  | 1.4653  | 9.9511  |
| 35 C | 9.4723  | 1.2085  | 8.0917  |
| 36 H | 9.9739  | 0.2835  | 8.3682  |
| 37 C | 9.6867  | 1.7422  | 6.8045  |
| 38 C | 7.5556  | 4.6956  | 6.7253  |
| 39 C | 8.2385  | 3.5118  | 7.2213  |
| 40 C | 7.5143  | 6.7080  | 3.6522  |
| 41 C | 7.2597  | 8.2109  | 1.9965  |
| 42 C | 6.7385  | 9.4118  | 1.2360  |
| 43 C | 7.7071  | 9.4534  | 0.0038  |
| 44 H | 8.4580  | 10.2394 | 0.1685  |
| 45 H | 7.1682  | 9.7078  | -0.9190 |
| 46 C | 8.4404  | 8.0717  | -0.1257 |
| 47 C | 8.1973  | 7.4770  | 1.2428  |
| 48 C | 6.8168  | 10.6947 | 2.0823  |

|      |         |         |         |
|------|---------|---------|---------|
| 49 H | 6.1746  | 10.6162 | 2.9700  |
| 50 H | 6.4820  | 11.5570 | 1.4885  |
| 51 H | 7.8449  | 10.8883 | 2.4178  |
| 52 C | 5.2719  | 9.1506  | 0.8213  |
| 53 H | 5.1759  | 8.2451  | 0.2075  |
| 54 H | 4.8963  | 10.0019 | 0.2362  |
| 55 H | 4.6359  | 9.0304  | 1.7092  |
| 56 C | 9.9431  | 8.2331  | -0.4178 |
| 57 H | 10.0855 | 8.7106  | -1.3979 |
| 58 H | 10.4427 | 7.2557  | -0.4321 |
| 59 H | 10.4332 | 8.8557  | 0.3433  |
| 60 C | 7.8002  | 7.1625  | -1.2002 |
| 61 H | 6.7232  | 7.0241  | -1.0331 |
| 62 H | 8.2748  | 6.1722  | -1.1938 |
| 63 H | 7.9390  | 7.6099  | -2.1947 |
| 64 C | 10.5920 | 1.0361  | 5.8592  |
| 65 C | 12.0528 | -0.6167 | 5.4181  |
| 66 C | 12.9476 | -1.8173 | 5.6394  |
| 67 C | 13.4030 | -2.1499 | 4.1756  |
| 68 H | 14.4639 | -2.4325 | 4.1424  |
| 69 H | 12.8252 | -3.0112 | 3.8108  |
| 70 C | 13.1133 | -0.9164 | 3.2494  |
| 71 C | 12.1451 | -0.1268 | 4.1000  |
| 72 C | 14.1312 | -1.4049 | 6.5449  |
| 73 H | 14.7119 | -0.5812 | 6.1087  |
| 74 H | 14.8053 | -2.2618 | 6.6859  |
| 75 H | 13.7671 | -1.0815 | 7.5299  |
| 76 C | 12.1787 | -2.9802 | 6.2906  |
| 77 H | 11.8202 | -2.6991 | 7.2902  |
| 78 H | 12.8365 | -3.8551 | 6.3927  |
| 79 H | 11.3106 | -3.2733 | 5.6841  |
| 80 C | 14.3764 | -0.0626 | 2.9900  |
| 81 H | 14.8606 | 0.2492  | 3.9253  |
| 82 H | 14.1156 | 0.8422  | 2.4250  |
| 83 H | 15.1029 | -0.6440 | 2.4043  |
| 84 C | 12.4861 | -1.3282 | 1.9056  |
| 85 H | 13.1984 | -1.9374 | 1.3308  |
| 86 H | 12.2272 | -0.4427 | 1.3108  |
| 87 H | 11.5709 | -1.9181 | 2.0557  |
| 88 C | 6.8539  | 3.3854  | 10.8306 |
| 89 C | 5.5478  | 3.1693  | 11.3018 |
| 90 C | 5.3071  | 2.8295  | 12.6328 |
| 91 C | 6.3786  | 2.7078  | 13.5263 |
| 92 C | 7.6882  | 2.9278  | 13.0789 |
| 93 C | 7.9167  | 3.2578  | 11.7464 |
| 94 H | 4.7080  | 3.2491  | 10.6100 |
| 95 H | 4.2846  | 2.6518  | 12.9748 |
| 96 O | 6.2110  | 2.3736  | 14.8487 |
| 97 H | 8.5126  | 2.8455  | 13.7873 |
| 98 H | 5.2574  | 2.2555  | 15.0202 |

## Optimized Coordinates of Eu-5

|    |    |         |         |         |
|----|----|---------|---------|---------|
| 1  | Eu | 9.4755  | 3.7547  | 3.8770  |
| 2  | O  | 11.3861 | 4.0538  | 2.1901  |
| 3  | O  | 9.6326  | 2.9672  | 1.4435  |
| 4  | O  | 11.3642 | 3.2974  | 0.1192  |
| 5  | O  | 6.9368  | 3.4970  | 2.9969  |
| 6  | O  | 7.8166  | 1.7036  | 3.8925  |
| 7  | O  | 5.7557  | 1.6404  | 3.1161  |
| 8  | O  | 10.6867 | 5.8986  | 4.8121  |
| 9  | O  | 11.7536 | 4.0484  | 5.2935  |
| 10 | O  | 12.5777 | 5.9865  | 5.9405  |
| 11 | N  | 7.8077  | 5.1242  | 5.4643  |
| 12 | N  | 9.0826  | 2.8620  | 6.3809  |
| 13 | N  | 8.4095  | 5.9892  | 2.9503  |
| 14 | N  | 8.7617  | 6.3709  | 1.7127  |
| 15 | N  | 6.9010  | 7.8338  | 3.2149  |
| 16 | N  | 10.6593 | 1.5183  | 4.6060  |
| 17 | N  | 11.4507 | 0.9302  | 3.6966  |
| 18 | N  | 11.2724 | -0.0394 | 6.3213  |
| 19 | N  | 10.8118 | 3.4352  | 1.2165  |
| 20 | N  | 6.8053  | 2.2645  | 3.3255  |
| 21 | N  | 11.7015 | 5.3278  | 5.3637  |
| 22 | C  | 7.1890  | 6.2296  | 5.0218  |
| 23 | C  | 6.2621  | 6.9504  | 5.8080  |
| 24 | H  | 5.7918  | 7.8352  | 5.3839  |
| 25 | C  | 5.9874  | 6.5132  | 7.0849  |
| 26 | H  | 5.2765  | 7.0473  | 7.7178  |
| 27 | C  | 6.6396  | 5.3645  | 7.5881  |
| 28 | C  | 6.4300  | 4.8938  | 8.9170  |
| 29 | H  | 5.7523  | 5.4563  | 9.5620  |
| 30 | C  | 7.0857  | 3.7960  | 9.4223  |
| 31 | H  | 8.9386  | 3.4397  | 11.4136 |
| 32 | C  | 7.9908  | 3.0659  | 8.5573  |
| 33 | C  | 8.6280  | 1.8699  | 8.9590  |
| 34 | H  | 8.4339  | 1.4667  | 9.9518  |
| 35 | C  | 9.4745  | 1.2107  | 8.0933  |
| 36 | H  | 9.9768  | 0.2862  | 8.3701  |
| 37 | C  | 9.6879  | 1.7435  | 6.8055  |
| 38 | C  | 7.5555  | 4.6960  | 6.7252  |
| 39 | C  | 8.2386  | 3.5124  | 7.2214  |
| 40 | C  | 7.5140  | 6.7080  | 3.6520  |
| 41 | C  | 7.2597  | 8.2108  | 1.9961  |
| 42 | C  | 6.7390  | 9.4120  | 1.2358  |
| 43 | C  | 7.7075  | 9.4533  | 0.0035  |
| 44 | H  | 8.4588  | 10.2391 | 0.1683  |
| 45 | H  | 7.1687  | 9.7080  | -0.9192 |
| 46 | C  | 8.4403  | 8.0714  | -0.1260 |
| 47 | C  | 8.1970  | 7.4766  | 1.2423  |
| 48 | C  | 6.8176  | 10.6948 | 2.0822  |

|      |         |         |         |
|------|---------|---------|---------|
| 49 H | 6.1754  | 10.6163 | 2.9700  |
| 50 H | 6.4829  | 11.5573 | 1.4886  |
| 51 H | 7.8458  | 10.8882 | 2.4177  |
| 52 C | 5.2723  | 9.1513  | 0.8210  |
| 53 H | 5.1761  | 8.2457  | 0.2073  |
| 54 H | 4.8970  | 10.0027 | 0.2358  |
| 55 H | 4.6362  | 9.0315  | 1.7088  |
| 56 C | 9.9432  | 8.2323  | -0.4179 |
| 57 H | 10.0858 | 8.7098  | -1.3979 |
| 58 H | 10.4424 | 7.2547  | -0.4322 |
| 59 H | 10.4334 | 8.8547  | 0.3433  |
| 60 C | 7.8000  | 7.1626  | -1.2007 |
| 61 H | 6.7230  | 7.0244  | -1.0337 |
| 62 H | 8.2744  | 6.1722  | -1.1946 |
| 63 H | 7.9389  | 7.6103  | -2.1951 |
| 64 C | 10.5929 | 1.0369  | 5.8604  |
| 65 C | 12.0535 | -0.6159 | 5.4191  |
| 66 C | 12.9489 | -1.8161 | 5.6405  |
| 67 C | 13.4032 | -2.1495 | 4.1766  |
| 68 H | 14.4641 | -2.4320 | 4.1428  |
| 69 H | 12.8252 | -3.0111 | 3.8126  |
| 70 C | 13.1127 | -0.9166 | 3.2500  |
| 71 C | 12.1447 | -0.1269 | 4.1006  |
| 72 C | 14.1330 | -1.4030 | 6.5449  |
| 73 H | 14.7132 | -0.5795 | 6.1079  |
| 74 H | 14.8073 | -2.2597 | 6.6861  |
| 75 H | 13.7695 | -1.0791 | 7.5300  |
| 76 C | 12.1806 | -2.9788 | 6.2930  |
| 77 H | 11.8228 | -2.6973 | 7.2927  |
| 78 H | 12.8387 | -3.8535 | 6.3950  |
| 79 H | 11.3121 | -3.2724 | 5.6872  |
| 80 C | 14.3755 | -0.0625 | 2.9896  |
| 81 H | 14.8599 | 0.2497  | 3.9247  |
| 82 H | 14.1141 | 0.8420  | 2.4244  |
| 83 H | 15.1018 | -0.6439 | 2.4039  |
| 84 C | 12.4851 | -1.3291 | 1.9065  |
| 85 H | 13.1973 | -1.9384 | 1.3318  |
| 86 H | 12.2259 | -0.4439 | 1.3114  |
| 87 H | 11.5701 | -1.9191 | 2.0572  |
| 88 C | 6.8533  | 3.3858  | 10.8301 |
| 89 C | 5.5467  | 3.1755  | 11.3024 |
| 90 C | 5.3058  | 2.8333  | 12.6327 |
| 91 C | 6.3779  | 2.7020  | 13.5241 |
| 92 C | 7.6880  | 2.9170  | 13.0758 |
| 93 C | 7.9164  | 3.2510  | 11.7445 |
| 94 H | 4.7064  | 3.2601  | 10.6116 |
| 95 H | 4.2827  | 2.6607  | 12.9756 |
| 96 O | 6.2101  | 2.3675  | 14.8463 |
| 97 H | 8.5129  | 2.8284  | 13.7830 |
| 98 H | 5.2562  | 2.2529  | 15.0183 |

## Optimized Coordinates of Am-6

|      |         |         |         |
|------|---------|---------|---------|
| 1 Am | 9.5762  | 3.5894  | 3.9540  |
| 2 O  | 11.4737 | 3.8705  | 2.2483  |
| 3 O  | 9.7061  | 2.7945  | 1.5196  |
| 4 O  | 11.4292 | 3.1082  | 0.1802  |
| 5 O  | 7.0273  | 3.3468  | 3.0958  |
| 6 O  | 7.9018  | 1.5508  | 3.9913  |
| 7 O  | 5.8323  | 1.5005  | 3.2366  |
| 8 O  | 10.8122 | 5.7268  | 4.8724  |
| 9 O  | 11.8709 | 3.8703  | 5.3473  |
| 10 O | 12.6230 | 5.9759  | 5.9290  |
| 11 N | 7.8425  | 5.1425  | 5.5069  |
| 12 N | 9.1113  | 2.8771  | 6.4043  |
| 13 N | 8.4279  | 5.9991  | 2.9765  |
| 14 N | 8.7621  | 6.3734  | 1.7314  |
| 15 N | 6.9389  | 7.8562  | 3.2594  |
| 16 N | 10.6634 | 1.5196  | 4.6163  |
| 17 N | 11.4384 | 0.9216  | 3.6991  |
| 18 N | 11.2865 | -0.0364 | 6.3297  |
| 19 N | 10.8867 | 3.2532  | 1.2818  |
| 20 N | 6.8897  | 2.1170  | 3.4316  |
| 21 N | 11.8275 | 5.1499  | 5.4163  |
| 22 C | 7.2460  | 6.2609  | 5.0691  |
| 23 C | 6.3653  | 7.0116  | 5.8744  |
| 24 H | 5.9258  | 7.9204  | 5.4686  |
| 25 C | 6.0914  | 6.5769  | 7.1525  |
| 26 H | 5.4190  | 7.1432  | 7.7950  |
| 27 C | 6.6926  | 5.3953  | 7.6461  |
| 28 C | 6.4498  | 4.9147  | 8.9893  |
| 29 H | 6.9929  | 6.4419  | 11.1907 |
| 30 C | 7.1255  | 3.8007  | 9.4576  |
| 31 H | 8.8838  | 3.8173  | 11.5490 |
| 32 C | 8.0377  | 3.0897  | 8.5878  |
| 33 C | 8.6969  | 1.9062  | 8.9966  |
| 34 H | 8.5272  | 1.5195  | 10.0002 |
| 35 C | 9.5356  | 1.2444  | 8.1263  |
| 36 H | 10.0532 | 0.3299  | 8.4083  |
| 37 C | 9.7232  | 1.7615  | 6.8280  |
| 38 C | 7.5924  | 4.7171  | 6.7711  |
| 39 C | 8.2756  | 3.5294  | 7.2513  |
| 40 C | 7.5507  | 6.7275  | 3.6905  |
| 41 C | 7.2745  | 8.2223  | 2.0311  |
| 42 C | 6.7443  | 9.4207  | 1.2733  |
| 43 C | 7.6906  | 9.4510  | 0.0236  |
| 44 H | 8.4478  | 10.2346 | 0.1705  |
| 45 H | 7.1363  | 9.7027  | -0.8907 |
| 46 C | 8.4154  | 8.0652  | -0.1110 |
| 47 C | 8.1935  | 7.4785  | 1.2645  |
| 48 C | 6.8417  | 10.7081 | 2.1107  |

|      |         |         |         |
|------|---------|---------|---------|
| 49 H | 6.2156  | 10.6363 | 3.0104  |
| 50 H | 6.4987  | 11.5682 | 1.5184  |
| 51 H | 7.8764  | 10.9002 | 2.4264  |
| 52 C | 5.2695  | 9.1618  | 0.8871  |
| 53 H | 5.1592  | 8.2525  | 0.2813  |
| 54 H | 4.8859  | 10.0106 | 0.3034  |
| 55 H | 4.6497  | 9.0496  | 1.7874  |
| 56 C | 9.9135  | 8.2182  | -0.4294 |
| 57 H | 10.0417 | 8.6906  | -1.4138 |
| 58 H | 10.4083 | 7.2385  | -0.4473 |
| 59 H | 10.4190 | 8.8420  | 0.3206  |
| 60 C | 7.7527  | 7.1532  | -1.1692 |
| 61 H | 6.6782  | 7.0206  | -0.9824 |
| 62 H | 8.2229  | 6.1608  | -1.1655 |
| 63 H | 7.8760  | 7.5946  | -2.1685 |
| 64 C | 10.6095 | 1.0441  | 5.8738  |
| 65 C | 12.0493 | -0.6238 | 5.4191  |
| 66 C | 12.9352 | -1.8327 | 5.6322  |
| 67 C | 13.3665 | -2.1754 | 4.1635  |
| 68 H | 14.4239 | -2.4690 | 4.1165  |
| 69 H | 12.7748 | -3.0320 | 3.8099  |
| 70 C | 13.0764 | -0.9424 | 3.2369  |
| 71 C | 12.1273 | -0.1406 | 4.0977  |
| 72 C | 14.1357 | -1.4297 | 6.5193  |
| 73 H | 14.7186 | -0.6137 | 6.0717  |
| 74 H | 14.8029 | -2.2930 | 6.6541  |
| 75 H | 13.7891 | -1.0988 | 7.5082  |
| 76 C | 12.1636 | -2.9854 | 6.2983  |
| 77 H | 11.8221 | -2.6973 | 7.3019  |
| 78 H | 12.8137 | -3.8668 | 6.3941  |
| 79 H | 11.2841 | -3.2714 | 5.7051  |
| 80 C | 14.3443 | -0.1021 | 2.9573  |
| 81 H | 14.8439 | 0.2085  | 3.8850  |
| 82 H | 14.0847 | 0.8030  | 2.3924  |
| 83 H | 15.0575 | -0.6926 | 2.3644  |
| 84 C | 12.4269 | -1.3526 | 1.9032  |
| 85 H | 13.1251 | -1.9707 | 1.3206  |
| 86 H | 12.1682 | -0.4666 | 1.3091  |
| 87 H | 11.5081 | -1.9330 | 2.0682  |
| 88 C | 6.9076  | 3.2894  | 10.8433 |
| 89 C | 5.6862  | 2.7056  | 11.2112 |
| 90 C | 5.4820  | 2.2169  | 12.5016 |
| 91 C | 6.5038  | 2.3112  | 13.4543 |
| 92 C | 7.7305  | 2.8904  | 13.1062 |
| 93 C | 7.9251  | 3.3662  | 11.8113 |
| 94 H | 4.8844  | 2.6258  | 10.4766 |
| 95 H | 4.5253  | 1.7606  | 12.7680 |
| 96 O | 6.3627  | 1.8526  | 14.7434 |
| 97 H | 8.5172  | 2.9622  | 13.8575 |
| 98 H | 5.4643  | 1.4851  | 14.8429 |



|       |        |        |         |
|-------|--------|--------|---------|
| 99 C  | 5.4872 | 5.6645 | 9.8494  |
| 100 C | 4.1135 | 5.6610 | 9.5586  |
| 101 C | 3.2078 | 6.3768 | 10.3431 |
| 102 C | 3.6703 | 7.1260 | 11.4320 |
| 103 C | 5.0375 | 7.1443 | 11.7348 |
| 104 C | 5.9295 | 6.4173 | 10.9505 |
| 105 H | 3.7432 | 5.0840 | 8.7095  |
| 106 H | 2.1411 | 6.3543 | 10.1057 |
| 107 O | 2.8336 | 7.8641 | 12.2371 |
| 108 H | 5.3850 | 7.7341 | 12.5830 |
| 109 H | 1.9200 | 7.7621 | 11.9095 |

## Optimized Coordinates of Eu-6

|    |    |         |         |         |
|----|----|---------|---------|---------|
| 1  | Eu | 9.4764  | 3.7552  | 3.8772  |
| 2  | O  | 11.3879 | 4.0540  | 2.1912  |
| 3  | O  | 9.6347  | 2.9678  | 1.4435  |
| 4  | O  | 11.3676 | 3.2969  | 0.1206  |
| 5  | O  | 6.9382  | 3.4975  | 2.9953  |
| 6  | O  | 7.8173  | 1.7044  | 3.8921  |
| 7  | O  | 5.7565  | 1.6413  | 3.1152  |
| 8  | O  | 10.6874 | 5.8987  | 4.8134  |
| 9  | O  | 11.7537 | 4.0483  | 5.2950  |
| 10 | O  | 12.5780 | 5.9861  | 5.9425  |
| 11 | N  | 7.8083  | 5.1240  | 5.4645  |
| 12 | N  | 9.0827  | 2.8617  | 6.3808  |
| 13 | N  | 8.4105  | 5.9898  | 2.9508  |
| 14 | N  | 8.7628  | 6.3718  | 1.7134  |
| 15 | N  | 6.9011  | 7.8338  | 3.2153  |
| 16 | N  | 10.6598 | 1.5185  | 4.6053  |
| 17 | N  | 11.4518 | 0.9306  | 3.6961  |
| 18 | N  | 11.2710 | -0.0406 | 6.3200  |
| 19 | N  | 10.8143 | 3.4353  | 1.2174  |
| 20 | N  | 6.8062  | 2.2653  | 3.3245  |
| 21 | N  | 11.7017 | 5.3277  | 5.3655  |
| 22 | C  | 7.1889  | 6.2290  | 5.0217  |
| 23 | C  | 6.2613  | 6.9492  | 5.8077  |
| 24 | H  | 5.7909  | 7.8339  | 5.3836  |
| 25 | C  | 5.9869  | 6.5122  | 7.0847  |
| 26 | H  | 5.2759  | 7.0463  | 7.7176  |
| 27 | C  | 6.6393  | 5.3637  | 7.5879  |
| 28 | C  | 6.4298  | 4.8929  | 8.9169  |
| 29 | H  | 7.2063  | 6.4707  | 10.9851 |
| 30 | C  | 7.0857  | 3.7952  | 9.4223  |
| 31 | H  | 8.8074  | 3.7878  | 11.5337 |
| 32 | C  | 7.9902  | 3.0648  | 8.5570  |
| 33 | C  | 8.6271  | 1.8683  | 8.9581  |
| 34 | H  | 8.4336  | 1.4653  | 9.9511  |
| 35 | C  | 9.4723  | 1.2085  | 8.0917  |
| 36 | H  | 9.9739  | 0.2835  | 8.3682  |
| 37 | C  | 9.6867  | 1.7422  | 6.8045  |
| 38 | C  | 7.5556  | 4.6956  | 6.7253  |
| 39 | C  | 8.2385  | 3.5118  | 7.2213  |
| 40 | C  | 7.5143  | 6.7080  | 3.6522  |
| 41 | C  | 7.2597  | 8.2109  | 1.9965  |
| 42 | C  | 6.7385  | 9.4118  | 1.2360  |
| 43 | C  | 7.7071  | 9.4534  | 0.0038  |
| 44 | H  | 8.4580  | 10.2394 | 0.1685  |
| 45 | H  | 7.1682  | 9.7078  | -0.9190 |
| 46 | C  | 8.4404  | 8.0717  | -0.1257 |
| 47 | C  | 8.1973  | 7.4770  | 1.2428  |
| 48 | C  | 6.8168  | 10.6947 | 2.0823  |

|    |   |         |         |         |
|----|---|---------|---------|---------|
| 49 | H | 6.1746  | 10.6162 | 2.9700  |
| 50 | H | 6.4820  | 11.5570 | 1.4885  |
| 51 | H | 7.8449  | 10.8883 | 2.4178  |
| 52 | C | 5.2719  | 9.1506  | 0.8213  |
| 53 | H | 5.1759  | 8.2451  | 0.2075  |
| 54 | H | 4.8963  | 10.0019 | 0.2362  |
| 55 | H | 4.6359  | 9.0304  | 1.7092  |
| 56 | C | 9.9431  | 8.2331  | -0.4178 |
| 57 | H | 10.0855 | 8.7106  | -1.3979 |
| 58 | H | 10.4427 | 7.2557  | -0.4321 |
| 59 | H | 10.4332 | 8.8557  | 0.3433  |
| 60 | C | 7.8002  | 7.1625  | -1.2002 |
| 61 | H | 6.7232  | 7.0241  | -1.0331 |
| 62 | H | 8.2748  | 6.1722  | -1.1938 |
| 63 | H | 7.9390  | 7.6099  | -2.1947 |
| 64 | C | 10.5920 | 1.0361  | 5.8592  |
| 65 | C | 12.0528 | -0.6167 | 5.4181  |
| 66 | C | 12.9476 | -1.8173 | 5.6394  |
| 67 | C | 13.4030 | -2.1499 | 4.1756  |
| 68 | H | 14.4639 | -2.4325 | 4.1424  |
| 69 | H | 12.8252 | -3.0112 | 3.8108  |
| 70 | C | 13.1133 | -0.9164 | 3.2494  |
| 71 | C | 12.1451 | -0.1268 | 4.1000  |
| 72 | C | 14.1312 | -1.4049 | 6.5449  |
| 73 | H | 14.7119 | -0.5812 | 6.1087  |
| 74 | H | 14.8053 | -2.2618 | 6.6859  |
| 75 | H | 13.7671 | -1.0815 | 7.5299  |
| 76 | C | 12.1787 | -2.9802 | 6.2906  |
| 77 | H | 11.8202 | -2.6991 | 7.2902  |
| 78 | H | 12.8365 | -3.8551 | 6.3927  |
| 79 | H | 11.3106 | -3.2733 | 5.6841  |
| 80 | C | 14.3764 | -0.0626 | 2.9900  |
| 81 | H | 14.8606 | 0.2492  | 3.9253  |
| 82 | H | 14.1156 | 0.8422  | 2.4250  |
| 83 | H | 15.1029 | -0.6440 | 2.4043  |
| 84 | C | 12.4861 | -1.3282 | 1.9056  |
| 85 | H | 13.1984 | -1.9374 | 1.3308  |
| 86 | H | 12.2272 | -0.4427 | 1.3108  |
| 87 | H | 11.5709 | -1.9181 | 2.0557  |
| 88 | C | 6.8263  | 3.3158  | 10.8096 |
| 89 | C | 5.5689  | 2.7954  | 11.1530 |
| 90 | C | 5.3158  | 2.3670  | 12.4586 |
| 91 | C | 6.3245  | 2.4438  | 13.4387 |
| 92 | C | 7.5810  | 2.9536  | 13.0894 |
| 93 | C | 7.8316  | 3.3905  | 11.7851 |
| 94 | H | 4.7847  | 2.7261  | 10.4094 |
| 95 | H | 4.3363  | 1.9763  | 12.7038 |
| 96 | O | 6.1149  | 2.0289  | 14.7366 |
| 97 | H | 8.3660  | 3.0130  | 13.8325 |
| 98 | H | 5.1833  | 1.6988  | 14.8189 |

|       |        |        |         |
|-------|--------|--------|---------|
| 99 C  | 5.5568 | 5.6704 | 9.8398  |
| 100 C | 4.1610 | 5.6068 | 9.7208  |
| 101 C | 3.3468 | 6.2831 | 10.6337 |
| 102 C | 3.9218 | 7.0227 | 11.6864 |
| 103 C | 5.3157 | 7.0883 | 11.7959 |
| 104 C | 6.1295 | 6.4210 | 10.8776 |
| 105 H | 3.7081 | 5.0257 | 8.9275  |
| 106 H | 2.2713 | 6.2232 | 10.5252 |
| 107 O | 3.1530 | 7.6823 | 12.6218 |
| 108 H | 5.7710 | 7.6528 | 12.5997 |
| 109 H | 2.1959 | 7.5323 | 12.4092 |
